# Supplementary material for: Phylogenomic analysis of Wolbachia genomes from the Darwin Tree of Life biodiversity genomics project
Source: PubMed Central journal article supplement (PMC9894559; doi:10.1371/journal.pbio.3001972), 2023-01-23
Supplement: pbio.3001972.s002.pdf [file pbio.3001972.s002.pdf]

**S1 Table. Overview of all DTOL screened genomes**

| Scientific name                    | Species name                | Taxonomic order | Biospecimen ID | Sex     | Tissue         |
|------------------------------------|-----------------------------|-----------------|----------------|---------|----------------|
| <i>Abrostola tripartita</i>        | The Spectacle               | Lepidoptera     | SAMEA7520667   | Male    | HEAD   THORAX  |
| <i>Acleris emargana</i>            | Notch-wing Button           | Lepidoptera     | SAMEA7746613   | Male    | WHOLE ORGANISM |
| <i>Acleris sparsana</i>            | Ashy button                 | Lepidoptera     | SAMEA8603209   | Male    | WHOLE ORGANISM |
| <i>Acrobasis consociella</i>       | Broad-barred Knot-horn      | Lepidoptera     | SAMEA7701461   | Unknown | WHOLE ORGANISM |
| <i>Acrobasis repandana</i>         | Warted Knot-horn            | Lepidoptera     | SAMEA7701659   | Unknown | WHOLE ORGANISM |
| <i>Acronicta aceris</i>            | The sycamore                | Lepidoptera     | SAMEA7701532   | Female  | ABDOMEN        |
| <i>Agonopterix arenella</i>        | Brindled Flat-body          | Lepidoptera     | SAMEA8603192   | Male    | WHOLE ORGANISM |
| <i>Agonopterix heracliiana</i>     | Common flat-body            | Lepidoptera     | SAMEA7701514   | Unknown | WHOLE ORGANISM |
| <i>Agonopterix subpropinquella</i> | Ruddy Flat-body             | Lepidoptera     | SAMEA7746629   | Male    | WHOLE ORGANISM |
| <i>Agriopis aurantiaria</i>        | Scarce umber                | Lepidoptera     | SAMEA8603214   | Male    | THORAX         |
| <i>Agriphila geniculea</i>         | Elbow-stripe Grass-veneer   | Lepidoptera     | SAMEA8603180   | Female  | WHOLE ORGANISM |
| <i>Agriphila straminella</i>       | Straw Grass-veneer          | Lepidoptera     | SAMEA7701512   | Unknown | WHOLE ORGANISM |
| <i>Agriphila tristella</i>         | Common grass-veneer         | Lepidoptera     | SAMEA8603174   | Male    | THORAX         |
| <i>Agrochola circellaris</i>       | The brick                   | Lepidoptera     | SAMEA8603201   | Male    | THORAX         |
| <i>Agrochola macilenta</i>         | Yellow-line quaker          | Lepidoptera     | SAMEA8603207   | Female  | THORAX         |
| <i>Allophyes oxyacanthae</i>       | Green-brindled crescent     | Lepidoptera     | SAMEA8603204   | Male    | THORAX         |
| <i>Amphipyra berbera</i>           | Svensson's copper underwing | Lepidoptera     | SAMEA7701493   | Male    | ABDOMEN        |
| <i>Amphipyra tragopoginis</i>      | Mouse moth                  | Lepidoptera     | SAMEA7520174   | Male    | HEAD   THORAX  |
| <i>Anthocharis cardamines</i>      | Orange tip                  | Lepidoptera     | SAMEA7523110   | Female  | WHOLE ORGANISM |
| <i>Apamea monoglypha</i>           | Dark arches                 | Lepidoptera     | SAMEA7701555   | Male    | ABDOMEN        |
| <i>Apatura iris</i>                | Purple emperor              | Lepidoptera     | SAMEA7523112   | Unknown | WHOLE ORGANISM |
| <i>Apeira syringaria</i>           | Lilac beauty                | Lepidoptera     | SAMEA7520685   | Male    | HEAD   THORAX  |
| <i>Aplocera efformata</i>          | Lesser treble-bar           | Lepidoptera     | SAMEA8603170   | Female  | THORAX         |
| <i>Aporia crataegi</i>             | Black Veined White          | Lepidoptera     | SAMEA7523355   | Male    | WHOLE ORGANISM |
| <i>Aporophyla lueneburgensis</i>   | Northern deep-brown dart    | Lepidoptera     | SAMEA8603194   | Female  | THORAX         |
| <i>Apotomis betuletana</i>         | Birch marble                | Lepidoptera     | SAMEA7701588   | Male    | WHOLE ORGANISM |
| <i>Apotomis turbidana</i>          | White-shouldered Marble     | Lepidoptera     | SAMEA7520681   | Unknown | WHOLE ORGANISM |
| <i>Archips podanus</i>             | Large Fruit-tree Tortrix    | Lepidoptera     | SAMEA7701540   | Unknown | WHOLE ORGANISM |

|                                  |                                 |             |              |         |                  |
|----------------------------------|---------------------------------|-------------|--------------|---------|------------------|
| <i>Archips xylosteana</i>        | Variiegated Golden Tortrix      | Lepidoptera | SAMEA7701541 | Unknown | WHOLE ORGANISM   |
| <i>Argyresthia goedartella</i>   | Golden Argent                   | Lepidoptera | SAMEA7520176 | Unknown | WHOLE ORGANISM   |
| <i>Aricia agestis</i>            | Brown argus                     | Lepidoptera | SAMEA7523300 | Male    | WHOLE ORGANISM   |
| <i>Atethmia centrago</i>         | Centre-barred sawfly            | Lepidoptera | SAMEA7520177 | Male    | HEAD   THORAX    |
| <i>Autographa gamma</i>          | Silver Y                        | Lepidoptera | SAMEA7519848 | Female  | HEAD   THORAX    |
| <i>Autographa pulchrina</i>      | Beautiful Golden Y              | Lepidoptera | SAMEA7520527 | Female  | HEAD   THORAX    |
| <i>Bembecia ichneumoniformis</i> | Six-belted clearwing            | Lepidoptera | SAMEA7701282 | Male    | ABDOMEN          |
| <i>Biston betularia</i>          | Peppered moth                   | Lepidoptera | SAMEA7520512 | Male    | THORAX   ABDOMEN |
| <i>Blastobasis adustella</i>     | Dingy Dowd                      | Lepidoptera | SAMEA7520179 | Female  | WHOLE ORGANISM   |
| <i>Blastobasis lacticolella</i>  | London Dowd                     | Lepidoptera | SAMEA7519826 | Male    | WHOLE ORGANISM   |
| <i>Boloria selene</i>            | Small pearl-bordered fritillary | Lepidoptera | SAMEA7523131 | Female  | WHOLE ORGANISM   |
| <i>Calamotropha paludella</i>    | Bulrush Veneer                  | Lepidoptera | SAMEA7746625 | Male    | ABDOMEN          |
| <i>Campaea margaritaria</i>      | Light emerald                   | Lepidoptera | SAMEA7701535 | Male    | ABDOMEN          |
| <i>Camptogramma bilineatum</i>   | Yellow shell                    | Lepidoptera | SAMEA7701528 | Unknown | WHOLE ORGANISM   |
| <i>Caradrina clavipalpis</i>     | Pale mottled willow             | Lepidoptera | SAMEA8603187 | Male    | THORAX           |
| <i>Caradrina kadenii</i>         | Clancy's Rustic                 | Lepidoptera | SAMEA8534280 | Female  | ABDOMEN          |
| <i>Carcina quercana</i>          | Long-horned flat-body           | Lepidoptera | SAMEA7519850 | Male    | WHOLE ORGANISM   |
| <i>Catocala fraxini</i>          | Cliften non-pareil              | Lepidoptera | SAMEA8603175 | Male    | THORAX           |
| <i>Catoptria pinella</i>         | Pearl Grass-veneer              | Lepidoptera | SAMEA7701506 | Unknown | WHOLE ORGANISM   |
| <i>Celastrina argiolus</i>       | Holly brown                     | Lepidoptera | SAMEA7523268 | Male    | WHOLE ORGANISM   |
| <i>Chloroclysta siterata</i>     | Red-green carpet                | Lepidoptera | SAMEA8603199 | Male    | THORAX           |
| <i>Chloroclystis v-ata</i>       | V-pug                           | Lepidoptera | SAMEA7701460 | Unknown | WHOLE ORGANISM   |
| <i>Chrysoteuchia culmella</i>    | Garden Grass-veneer             | Lepidoptera | SAMEA7701502 | Male    | WHOLE ORGANISM   |
| <i>Clostera curtula</i>          | Chocolate tip                   | Lepidoptera | SAMEA7520526 | Female  | ABDOMEN          |
| <i>Colias croceus</i>            | Clouded Yellow                  | Lepidoptera | SAMEA7523360 | Female  | THORAX           |
| <i>Colostygia pectinataria</i>   | Green carpet                    | Lepidoptera | SAMEA7520182 | Unknown | WHOLE ORGANISM   |
| <i>Cosmia trapezina</i>          | The dun-bar                     | Lepidoptera | SAMEA7519851 | Male    | THORAX   ABDOMEN |
| <i>Craniophora ligustri</i>      | The coronet                     | Lepidoptera | SAMEA7519852 | Female  | THORAX   ABDOMEN |
| <i>Crocallis elinguaris</i>      | Scalloped oak                   | Lepidoptera | SAMEA7701527 | Female  | ABDOMEN          |
| <i>Cupido minimus</i>            | Small blue                      | Lepidoptera | SAMEA7523306 | Male    | WHOLE ORGANISM   |
| <i>Cyaniris semiargus</i>        | Mazarine blue                   | Lepidoptera | SAMEA7523311 | Male    | WHOLE ORGANISM   |

|                                |                          |             |              |         |                  |
|--------------------------------|--------------------------|-------------|--------------|---------|------------------|
| <i>Cydia fagiglandana</i>      | Large Beech Piercer      | Lepidoptera | SAMEA7701453 | Unknown | WHOLE ORGANISM   |
| <i>Cydia splendana</i>         | Marbled Piercer          | Lepidoptera | SAMEA7701547 | Female  | WHOLE ORGANISM   |
| <i>Deilephila porcellus</i>    | Small elephant Hawk-moth | Lepidoptera | SAMEA7520522 | Male    | ABDOMEN          |
| <i>Diachrysia chrysitis</i>    | Burnished brass moth     | Lepidoptera | SAMEA8603181 | Male    | THORAX           |
| <i>Diarsia rubi</i>            | Small square-spot        | Lepidoptera | SAMEA8603186 | Female  | THORAX           |
| <i>Ditula angustiorana</i>     | Red-barred Tortrix       | Lepidoptera | SAMEA7701319 | Unknown | WHOLE ORGANISM   |
| <i>Dryobotodes eremita</i>     | Brindled green           | Lepidoptera | SAMEA8603190 | Female  | THORAX           |
| <i>Ecliptopera silaceata</i>   | Small phoenix            | Lepidoptera | SAMEA7701534 | Male    | WHOLE ORGANISM   |
| <i>Ectropis crepuscularia</i>  | The engrailed            | Lepidoptera | SAMEA7701526 | Unknown | WHOLE ORGANISM   |
| <i>Eilema depressum</i>        | Buff footman             | Lepidoptera | SAMEA7746611 | Male    | THORAX           |
| <i>Eilema sororcula</i>        | Orange Footman           | Lepidoptera | SAMEA7631555 | Male    | WHOLE ORGANISM   |
| <i>Emmelina monodactyla</i>    | Common plume             | Lepidoptera | SAMEA8603203 | Female  | WHOLE ORGANISM   |
| <i>Endotricha flammealis</i>   | Rosy tabby               | Lepidoptera | SAMEA7519855 | Female  | WHOLE ORGANISM   |
| <i>Ennomos fuscantarius</i>    | Dusky thorn              | Lepidoptera | SAMEA7520185 | Male    | HEAD   THORAX    |
| <i>Ennomos quercinarius</i>    | August thorn             | Lepidoptera | SAMEA7701560 | Male    | ABDOMEN          |
| <i>Epagoge grotiana</i>        | Brown-barred Tortrix     | Lepidoptera | SAMEA7701542 | Unknown | WHOLE ORGANISM   |
| <i>Epinotia brunnichana</i>    | Large Birch Bell         | Lepidoptera | SAMEA7701529 | Unknown | WHOLE ORGANISM   |
| <i>Epirrhoe alternata</i>      | common carpet            | Lepidoptera | SAMEA7701550 | Unknown | WHOLE ORGANISM   |
| <i>Erannis defoliaria</i>      | Mottled umber            | Lepidoptera | SAMEA7520367 | Male    | THORAX   ABDOMEN |
| <i>Erebia aethiops</i>         | Scotch argus             | Lepidoptera | SAMEA7523289 | Female  | WHOLE ORGANISM   |
| <i>Erebia ligea</i>            | Mountain ringlet         | Lepidoptera | SAMEA7523313 | Male    | WHOLE ORGANISM   |
| <i>Erynnis tages</i>           | Dingy skipper            | Lepidoptera | SAMEA7523299 | Male    | WHOLE ORGANISM   |
| <i>Eucosma campoliliana</i>    | Marbled Bell             | Lepidoptera | SAMEA7701295 | Unknown | WHOLE ORGANISM   |
| <i>Eucosma cana</i>            | Hoary Bell               | Lepidoptera | SAMEA7701552 | Unknown | WHOLE ORGANISM   |
| <i>Eulithis prunata</i>        | The Pheonix              | Lepidoptera | SAMEA7701309 | Male    | ABDOMEN          |
| <i>Euphydryas aurinia</i>      | Marsh Fritillary         | Lepidoptera | SAMEA7523466 | Unknown | WHOLE ORGANISM   |
| <i>Eupithecia centaureata</i>  | Lime-speck pug           | Lepidoptera | SAMEA7520186 | Male    | WHOLE ORGANISM   |
| <i>Eupithecia tripunctaria</i> | White-spotted pug        | Lepidoptera | SAMEA7701546 | Unknown | WHOLE ORGANISM   |
| <i>Euplexia lucipara</i>       | Small angle shades       | Lepidoptera | SAMEA7701470 | Male    | ABDOMEN          |
| <i>Euproctis similis</i>       | Yellow-tail              | Lepidoptera | SAMEA7519909 | Male    | THORAX   ABDOMEN |
| <i>Eupsilia transversa</i>     | satellite moth           | Lepidoptera | SAMEA8563699 | Female  | THORAX   ABDOMEN |

|                                 |                              |             |              |         |                  |
|---------------------------------|------------------------------|-------------|--------------|---------|------------------|
| <i>Fabriciana adippe</i>        | High brown fritillary        | Lepidoptera | SAMEA7523308 | Female  | ABDOMEN          |
| <i>Furcula furcula</i>          | Sallow kitten                | Lepidoptera | SAMEA7746637 | Male    | THORAX           |
| <i>Glaucopteryx alexis</i>      | Green-underside blue         | Lepidoptera | SAMEA7524616 | Male    | WHOLE ORGANISM   |
| <i>Griposia aprilina</i>        | Merveille du jour            | Lepidoptera | SAMEA8603200 | Female  | THORAX           |
| <i>Gymnoscelis rufifasciata</i> | Double-striped pug           | Lepidoptera | SAMEA7519910 | Female  | WHOLE ORGANISM   |
| <i>Habrosyne pyritoides</i>     | Buff arches                  | Lepidoptera | SAMEA7701298 | Male    | ABDOMEN          |
| <i>Hamearis lucina</i>          | Duke of Burgundy             | Lepidoptera | SAMEA7523117 | Unknown | WHOLE ORGANISM   |
| <i>Hecatera dysodea</i>         | Small ranunculus             | Lepidoptera | SAMEA7521514 | Female  | THORAX           |
| <i>Hedya salicella</i>          | White-backed Marble          | Lepidoptera | SAMEA7520688 | Male    | WHOLE ORGANISM   |
| <i>Hemaris fuciformis</i>       | broad-bordered bee hawk-moth | Lepidoptera | SAMEA5248724 | Unknown | WHOLE ORGANISM   |
| <i>Hesperia comma</i>           | Silver-spotted skipper       | Lepidoptera | SAMEA7523119 | Female  | WHOLE ORGANISM   |
| <i>Hydraecia micacea</i>        | Rosy rustic                  | Lepidoptera | SAMEA8603188 | Female  | THORAX           |
| <i>Hydriomena furcata</i>       | July highflyer               | Lepidoptera | SAMEA7701301 | Male    | ABDOMEN          |
| <i>Hylaea fasciaria</i>         | Barred red                   | Lepidoptera | SAMEA7520684 | Male    | HEAD   THORAX    |
| <i>Hypena proboscidalis</i>     | The snout                    | Lepidoptera | SAMEA7520188 | Female  | HEAD   THORAX    |
| <i>Idaea aversata</i>           | Riband Wave                  | Lepidoptera | SAMEA7519834 | Male    | WHOLE ORGANISM   |
| <i>Laothoe populi</i>           | Poplar Hawk-moth             | Lepidoptera | SAMEA7520519 | Female  | ABDOMEN          |
| <i>Lasiommata megera</i>        | Wall brown                   | Lepidoptera | SAMEA7523153 | Female  | WHOLE ORGANISM   |
| <i>Laspeyria flexula</i>        | Beautiful hook-tip           | Lepidoptera | SAMEA7519836 | Male    | WHOLE ORGANISM   |
| <i>Leptidea sinapis</i>         | Wood White                   | Lepidoptera | SAMEA7523467 | Male    | WHOLE ORGANISM   |
| <i>Limenitis camilla</i>        | White admiral                | Lepidoptera | SAMEA7523310 | Female  | WHOLE ORGANISM   |
| <i>Lobophora halterata</i>      | The Seraphim                 | Lepidoptera | SAMEA7520514 | Female  | ABDOMEN          |
| <i>Luperina testacea</i>        | Flounced Rustic              | Lepidoptera | SAMEA8534287 | Male    | THORAX           |
| <i>Lycaena phlaeas</i>          | Small copper                 | Lepidoptera | SAMEA7523293 | Male    | WHOLE ORGANISM   |
| <i>Lymantria monacha</i>        | Black arches                 | Lepidoptera | SAMEA7519912 | Male    | THORAX   ABDOMEN |
| <i>Lysandra bellargus</i>       | Adonis Blue                  | Lepidoptera | SAMEA7523471 | Female  | WHOLE ORGANISM   |
| <i>Lysandra coridon</i>         | Chalkhill blue               | Lepidoptera | SAMEA7523305 | Male    | WHOLE ORGANISM   |
| <i>Macaria notata</i>           | Peacock moth                 | Lepidoptera | SAMEA7746623 | Male    | ABDOMEN          |
| <i>Mamestra brassicae</i>       | Cabbage moth                 | Lepidoptera | SAMEA7524129 | Male    | MID_BODY         |
| <i>Maniola jurtina</i>          | Meadow brown                 | Lepidoptera | SAMEA7523158 | Female  | WHOLE ORGANISM   |
| <i>Marasmarcha lunaedactyla</i> | Crescent plume               | Lepidoptera | SAMEA7701293 | Female  | WHOLE ORGANISM   |

|                                 |                                         |             |              |         |                  |
|---------------------------------|-----------------------------------------|-------------|--------------|---------|------------------|
| <i>Meganola albula</i>          | Kent black arches                       | Lepidoptera | SAMEA7701294 | Male    | WHOLE ORGANISM   |
| <i>Melanargia galathea</i>      | Marbled white                           | Lepidoptera | SAMEA7523296 | Female  | WHOLE ORGANISM   |
| <i>Melitaea cinxia</i>          | Glanville Fritillary                    | Lepidoptera | SAMEA7523475 | Male    | WHOLE ORGANISM   |
| <i>Mellicta athalia</i>         | Heath fritillary                        | Lepidoptera | SAMEA7523312 | Female  | WHOLE ORGANISM   |
| <i>Mesoligia furuncula</i>      | Cloaked minor                           | Lepidoptera | SAMEA7701289 | Female  | WHOLE ORGANISM   |
| <i>Mimas tiliae</i>             | Lime Hawk-moth                          | Lepidoptera | SAMEA7520521 | Male    | ABDOMEN          |
| <i>Mythimna albipuncta</i>      | White-point                             | Lepidoptera | SAMEA8603191 | Male    | THORAX           |
| <i>Mythimna ferrago</i>         | The clay                                | Lepidoptera | SAMEA7701536 | Female  | ABDOMEN          |
| <i>Mythimna impura</i>          | Smoky wainscot                          | Lepidoptera | SAMEA7519913 | Female  | THORAX   ABDOMEN |
| <i>Neocoehylis molliculana</i>  | Ox-tongue Conch                         | Lepidoptera | SAMEA7746615 | Unknown | WHOLE ORGANISM   |
| <i>Noctua comes</i>             | Lesser yellow underwing                 | Lepidoptera | SAMEA7701458 | Unknown | ABDOMEN          |
| <i>Noctua fimbriata</i>         | Broad-bordered yellow underwing         | Lepidoptera | SAMEA7519914 | Female  | THORAX   ABDOMEN |
| <i>Noctua janthe</i>            | Lesser broad-boardered yellow underwing | Lepidoptera | SAMEA7701537 | Male    | ABDOMEN          |
| <i>Noctua pronuba</i>           | Large Yellow Underwing                  | Lepidoptera | SAMEA7519837 | Female  | WHOLE ORGANISM   |
| <i>Notocelia uddmanniana</i>    | Bramble shoot moth                      | Lepidoptera | SAMEA7519916 | Male    | WHOLE ORGANISM   |
| <i>Notodonta dromedarius</i>    | Iron prominent                          | Lepidoptera | SAMEA7520190 | Male    | HEAD   THORAX    |
| <i>Notodonta ziczac</i>         | Pebble prominent                        | Lepidoptera | SAMEA7746619 | Male    | THORAX           |
| <i>Nymphalis c-album</i>        | Comma                                   | Lepidoptera | SAMEA7523165 | Female  | WHOLE ORGANISM   |
| <i>Nymphalis io</i>             | Peacock                                 | Lepidoptera | SAMEA7523149 | Male    | WHOLE ORGANISM   |
| <i>Nymphalis polychloros</i>    | Large Tortoiseshell                     | Lepidoptera | SAMEA7523477 | Female  | THORAX           |
| <i>Nymphalis urticae</i>        | Small tortoiseshell                     | Lepidoptera | SAMEA7523286 | Female  | WHOLE ORGANISM   |
| <i>Ochlodes sylvanus</i>        | Large skipper                           | Lepidoptera | SAMEA7523138 | Female  | WHOLE ORGANISM   |
| <i>Ochropleura plecta</i>       | Flame shoulder                          | Lepidoptera | SAMEA7520524 | Female  | ABDOMEN          |
| <i>Omphaloscelis lunosa</i>     | Lunar underwing                         | Lepidoptera | SAMEA8603195 | Female  | THORAX           |
| <i>Operophtera brumata</i>      | Winter moth                             | Lepidoptera | SAMEA8563695 | Male    | THORAX   ABDOMEN |
| <i>Opisthograptis luteolata</i> | Brimstone moth                          | Lepidoptera | SAMEA7519838 | Male    | WHOLE ORGANISM   |
| <i>Orgyia antiqua</i>           | Rusty tussock moth                      | Lepidoptera | SAMEA7524390 | Male    | THORAX   ABDOMEN |
| <i>Ostrinia nubilalis</i>       | European corn borer                     | Lepidoptera | SAMEA7701321 | Unknown | WHOLE ORGANISM   |
| <i>Pammene fasciana</i>         | Acorn Piercer                           | Lepidoptera | SAMEA7701530 | Male    | WHOLE ORGANISM   |
| <i>Pandemis cinnamomeana</i>    | White-faced tortrix                     | Lepidoptera | SAMEA8603177 | Male    | WHOLE ORGANISM   |
| <i>Pandemis corylana</i>        | Chequered Fruit-tree Tortrix            | Lepidoptera | SAMEA7701543 | Unknown | WHOLE ORGANISM   |

|                                   |                           |             |              |         |                  |
|-----------------------------------|---------------------------|-------------|--------------|---------|------------------|
| <i>Papilio machaon</i>            | common yellow swallowtail | Lepidoptera | SAMEA7523121 | Female  | WHOLE ORGANISM   |
| <i>Parapoynx stratiotata</i>      | Ringed china-mark         | Lepidoptera | SAMEA7519920 | Male    | WHOLE ORGANISM   |
| <i>Pararge aegeria</i>            | Speckled wood             | Lepidoptera | SAMEA7532732 | Female  | WHOLE ORGANISM   |
| <i>Peribatodes rhomboidaria</i>   | Willow beauty             | Lepidoptera | SAMEA7701524 | Male    | ABDOMEN          |
| <i>Perizoma alchemillatum</i>     | Small rivulet             | Lepidoptera | SAMEA7701545 | Unknown | WHOLE ORGANISM   |
| <i>Perizoma flavofasciatum</i>    | Sandy carpet              | Lepidoptera | SAMEA7701445 | Unknown | WHOLE ORGANISM   |
| <i>Phalera bucephala</i>          | Buff-tip                  | Lepidoptera | SAMEA7519921 | Female  | THORAX   ABDOMEN |
| <i>Pheosia gnoma</i>              | Lesser swallow prominent  | Lepidoptera | SAMEA7520513 | Male    | ABDOMEN          |
| <i>Pheosia tremula</i>            | Swallow prominent         | Lepidoptera | SAMEA7520523 | Male    | THORAX   ABDOMEN |
| <i>Philereme vetulata</i>         | Brown scallop             | Lepidoptera | SAMEA7701300 | Female  | ABDOMEN          |
| <i>Phlogophora meticulosa</i>     | Angle shades              | Lepidoptera | SAMEA7520192 | Female  | HEAD   THORAX    |
| <i>Photedes minima</i>            | Small dotted buff         | Lepidoptera | SAMEA7701533 | Unknown | WHOLE ORGANISM   |
| <i>Phragmatobia fuliginosa</i>    | Ruby tiger moth           | Lepidoptera | SAMEA7701498 | Male    | ABDOMEN          |
| <i>Pieris brassicae</i>           | Large white               | Lepidoptera | SAMEA7532735 | Female  | WHOLE ORGANISM   |
| <i>Pieris napi</i>                | Green veined white        | Lepidoptera | SAMEA7523140 | Male    | WHOLE ORGANISM   |
| <i>Pieris rapae</i>               | Small white               | Lepidoptera | SAMEA7523164 | Female  | WHOLE ORGANISM   |
| <i>Plebejus argus</i>             | Silver-studded blue       | Lepidoptera | SAMEA7523294 | Male    | WHOLE ORGANISM   |
| <i>Plutella xylostella</i>        | Diamondback moth          | Lepidoptera | SAMEA7520369 | Male    | WHOLE ORGANISM   |
| <i>Polyommatus icarus</i>         | Common blue               | Lepidoptera | SAMEA7523143 | Male    | WHOLE ORGANISM   |
| <i>Psoricoptera gibbosella</i>    | Humped Groundling         | Lepidoptera | SAMEA7746612 | Unknown | WHOLE ORGANISM   |
| <i>Ptilodon capucinus</i>         | Coxcomb prominent         | Lepidoptera | SAMEA7746620 | Male    | THORAX           |
| <i>Ptycholomoides aeriferana</i>  | Yellow Larch Tortrix      | Lepidoptera | SAMEA7701538 | Unknown | WHOLE ORGANISM   |
| <i>Pyrgus malvae</i>              | Grizzled skipper          | Lepidoptera | SAMEA7523277 | Male    | WHOLE ORGANISM   |
| <i>Rhopobota naevana</i>          | Holly tortrix             | Lepidoptera | SAMEA7701517 | Unknown | WHOLE ORGANISM   |
| <i>Schranksia costaestrigalis</i> | Pinion-streaked snout     | Lepidoptera | SAMEA7520193 | Male    | WHOLE ORGANISM   |
| <i>Scotopteryx chenopodiata</i>   | Shaded broad-bar          | Lepidoptera | SAMEA7701561 | Unknown | WHOLE ORGANISM   |
| <i>Selenia dentaria</i>           | Early thorn               | Lepidoptera | SAMEA7701559 | Male    | ABDOMEN          |
| <i>Sesia apiformis</i>            | Hornet moth               | Lepidoptera | SAMEA7701281 | Male    | HEAD   THORAX    |
| <i>Sphinx pinastri</i>            | Pine hawkmoth             | Lepidoptera | SAMEA7701449 | Unknown | ABDOMEN          |
| <i>Spilarctia lutea</i>           | Buff ermine               | Lepidoptera | SAMEA7631557 | Female  | ABDOMEN          |
| <i>Spilosoma lubricipeda</i>      | White ermine              | Lepidoptera | SAMEA7520525 | Male    | ABDOMEN          |

|                                |                             |             |              |         |                  |
|--------------------------------|-----------------------------|-------------|--------------|---------|------------------|
| <i>Synanthedon vespiformis</i> | Yellow-legged clearwing     | Lepidoptera | SAMEA7701494 | Male    | ABDOMEN          |
| <i>Thumatha senex</i>          | Round-winged muslin         | Lepidoptera | SAMEA7701482 | Unknown | WHOLE ORGANISM   |
| <i>Thyatira batis</i>          | Peach blossom               | Lepidoptera | SAMEA7519923 | Male    | THORAX   ABDOMEN |
| <i>Thymelicus lineola</i>      | Essex skipper               | Lepidoptera | SAMEA7523301 | Female  | WHOLE ORGANISM   |
| <i>Thymelicus sylvestris</i>   | Small skipper               | Lepidoptera | SAMEA7523279 | Male    | WHOLE ORGANISM   |
| <i>Tinea semifulvella</i>      | Fulvous Clothes Moth        | Lepidoptera | SAMEA7520371 | Male    | WHOLE ORGANISM   |
| <i>Tinea trinotella</i>        | Bird's-nest moth            | Lepidoptera | SAMEA7519924 | Male    | WHOLE ORGANISM   |
| <i>Udea prunalis</i>           | Dusky Pearl                 | Lepidoptera | SAMEA7701501 | Unknown | WHOLE ORGANISM   |
| <i>Vanessa atalanta</i>        | Red admiral                 | Lepidoptera | SAMEA7523145 | Female  | WHOLE ORGANISM   |
| <i>Vanessa cardui</i>          | Painted lady                | Lepidoptera | SAMEA7523147 | Female  | WHOLE ORGANISM   |
| <i>Watsonalla binaria</i>      | Oak hook-tip                | Lepidoptera | SAMEA7746618 | Female  | ABDOMEN          |
| <i>Xanthorhoe fluctuata</i>    | Garden carpet               | Lepidoptera | SAMEA7701525 | Unknown | WHOLE ORGANISM   |
| <i>Xestia c-nigrum</i>         | Setaceous Hebrew character  | Lepidoptera | SAMEA8239458 | Male    | THORAX           |
| <i>Xestia xanthographa</i>     | Square-spot rustic          | Lepidoptera | SAMEA7520195 | Female  | HEAD   THORAX    |
| <i>Yponomeuta plumbellus</i>   | Black-tipped Ermine         | Lepidoptera | SAMEA7746626 | Unknown | WHOLE ORGANISM   |
| <i>Yponomeuta sedellus</i>     | Grey Ermine                 | Lepidoptera | SAMEA7746622 | Male    | WHOLE ORGANISM   |
| <i>Ypsolopha scabrella</i>     | Wainscot Smudge             | Lepidoptera | SAMEA7701504 | Male    | WHOLE ORGANISM   |
| <i>Ypsolopha sequella</i>      | Pied smudge                 | Lepidoptera | SAMEA7519929 | Male    | WHOLE ORGANISM   |
| <i>Zeiraphera isertana</i>     | Cock's-head Bell            | Lepidoptera | SAMEA7701465 | Unknown | WHOLE ORGANISM   |
| <i>Zeuzera pyrina</i>          | Leopard moth                | Lepidoptera | SAMEA7701286 | Male    | ABDOMEN          |
| <i>Zygaena filipendulae</i>    | 6-spot burnet               | Lepidoptera | SAMEA7519846 | Female  | WHOLE ORGANISM   |
| <i>Apoderus coryli</i>         | Hazel leaf-roller           | Coleoptera  | SAMEA7520690 | Male    | WHOLE ORGANISM   |
| <i>Cantharis rustica</i>       |                             | Coleoptera  | SAMEA7524272 | Male    | HEAD   THORAX    |
| <i>Podabrus alpinus</i>        |                             | Coleoptera  | SAMEA7520644 | Female  | WHOLE ORGANISM   |
| <i>Rhagonycha fulva</i>        | Common red soldier beetle   | Coleoptera  | SAMEA7520319 | Female  | WHOLE ORGANISM   |
| <i>Dromius quadrimaculatus</i> |                             | Coleoptera  | SAMEA7520206 | Unknown | WHOLE ORGANISM   |
| <i>Nebria brevicollis</i>      |                             | Coleoptera  | SAMEA7520209 | Female  | HEAD   THORAX    |
| <i>Nebria salina</i>           |                             | Coleoptera  | SAMEA7524273 | Female  | THORAX           |
| <i>Ophonus ardosiacus</i>      |                             | Coleoptera  | SAMEA7746467 | Female  | ABDOMEN          |
| <i>Pterostichus madidus</i>    | Black clock beetle          | Coleoptera  | SAMEA7520318 | Male    | HEAD   THORAX    |
| <i>Adalia bipunctata</i>       | two-spotted ladybird beetle | Coleoptera  | SAMEA9089055 | Male    | WHOLE ORGANISM   |

|                                       |                             |            |              |         |                  |
|---------------------------------------|-----------------------------|------------|--------------|---------|------------------|
| <i>Chilocorus renipustulatus</i>      | kidney-spot ladybird beetle | Coleoptera | SAMEA7520200 | Unknown | WHOLE ORGANISM   |
| <i>Coccinella septempunctata</i>      | Seven-spotted ladybird      | Coleoptera | SAMEA7520205 | Female  | WHOLE ORGANISM   |
| <i>Harmonia axyridis</i>              | Harlequin ladybird          | Coleoptera | SAMEA7520208 | Female  | WHOLE ORGANISM   |
| <i>Hippodamia variegata</i>           | Adonis ladybird             | Coleoptera | SAMEA7849270 | Unknown | WHOLE ORGANISM   |
| <i>Propylea quattuordecimpunctata</i> | 14-spot ladybird            | Coleoptera | SAMEA7520316 | Unknown | WHOLE ORGANISM   |
| <i>Rhinocyllus conicus</i>            |                             | Coleoptera | SAMEA7701490 | Unknown | WHOLE ORGANISM   |
| <i>Agrypnus murinus</i>               |                             | Coleoptera | SAMEA7701277 | Male    | ABDOMEN          |
| <i>Melolontha melolontha</i>          | cockchafer                  | Coleoptera | SAMEA7524378 | Male    | THORAX           |
| <i>Malachius bipustulatus</i>         | Common malachite beetle     | Coleoptera | SAMEA7520537 | Female  | WHOLE ORGANISM   |
| <i>Oedemera lurida</i>                |                             | Coleoptera | SAMEA7520207 | Unknown | WHOLE ORGANISM   |
| <i>Pyrochroa serraticornis</i>        | Red-headed cardinal beetle  | Coleoptera | SAMEA7524259 | Male    | THORAX           |
| <i>Phosphuga atrata</i>               | Black snail beetle          | Coleoptera | SAMEA7520321 | Unknown | HEAD   THORAX    |
| <i>Ocypus olens</i>                   | Devil's coach horse         | Coleoptera | SAMEA7520211 | Female  | THORAX   ABDOMEN |
| <i>Philonthus cognatus</i>            |                             | Coleoptera | SAMEA8603235 | Male    | ABDOMEN          |
| <i>Acrocera orbiculus</i>             | Top-horned Hunchback        | Diptera    | SAMEA7701562 | Unknown | WHOLE ORGANISM   |
| <i>Delia platura</i>                  | Bean seed fly               | Diptera    | SAMEA7746747 | Unknown | WHOLE ORGANISM   |
| <i>Machimus atricapillus</i>          |                             | Diptera    | SAMEA7849389 | Male    | ABDOMEN          |
| <i>Bombylius discolor</i>             | dotted bee fly              | Diptera    | SAMEA7524252 | Female  | THORAX           |
| <i>Bombylius major</i>                | dark edged bee fly          | Diptera    | SAMEA7524251 | Male    | THORAX           |
| <i>Bellardia pandia</i>               | Bisetose Emerald-bottle     | Diptera    | SAMEA7746779 | Female  | WHOLE ORGANISM   |
| <i>Lucilia richardsi</i>              |                             | Diptera    | SAMEA8603134 | Unknown | THORAX           |
| <i>Pollenia angustigena</i>           | Narrow-cheeked Clusterfly   | Diptera    | SAMEA7746597 | Female  | THORAX           |
| <i>Protocalliphora azurea</i>         | Bird blowfly                | Diptera    | SAMEA7746778 | Male    | THORAX           |
| <i>Clusia tigrina</i>                 |                             | Diptera    | SAMEA7701567 | Male    | WHOLE ORGANISM   |
| <i>Physocephala rufipes</i>           | Waisted Beegrabber          | Diptera    | SAMEA7746469 | Unknown | THORAX           |
| <i>Sicus ferrugineus</i>              | Ferruginous Bee-grabber     | Diptera    | SAMEA7520692 | Male    | WHOLE ORGANISM   |
| <i>Thecophora atra</i>                |                             | Diptera    | SAMEA7849382 | Male    | HEAD   THORAX    |
| <i>Tipula paludosa</i>                | European crane fly          | Diptera    | SAMEA7520335 | Female  | HEAD   THORAX    |
| <i>Empis livida</i>                   |                             | Diptera    | SAMEA8603147 | Unknown | THORAX           |
| <i>Callomyia amoena</i>               |                             | Diptera    | SAMEA9066034 | Female  | WHOLE ORGANISM   |
| <i>Stomorhina lunata</i>              | Locust Blowfly              | Diptera    | SAMEA7849406 | Female  | THORAX           |



|                                 |                              |         |              |         |                  |
|---------------------------------|------------------------------|---------|--------------|---------|------------------|
| <i>Tachina fera</i>             |                              | Diptera | SAMEA7520333 | Female  | HEAD   THORAX    |
| <i>Sarcophaga caerulescens</i>  |                              | Diptera | SAMEA7746589 | Male    | THORAX           |
| <i>Sarcophaga crassimargo</i>   |                              | Diptera | SAMEA7746602 | Male    | WHOLE ORGANISM   |
| <i>Sarcophaga rosellei</i>      |                              | Diptera | SAMEA7746603 | Male    | THORAX           |
| <i>Sarcophaga variegata</i>     |                              | Diptera | SAMEA8603132 | Male    | THORAX           |
| <i>Scathophaga stercoraria</i>  | yellow dung fly              | Diptera | SAMEA7520161 | Male    | HEAD   THORAX    |
| <i>Coremacera marginata</i>     |                              | Diptera | SAMEA7521524 | Female  | THORAX           |
| <i>Baccha elongata</i>          | Gossamer Hoverfly            | Diptera | SAMEA7520030 | Female  | WHOLE ORGANISM   |
| <i>Cheilosia pagana</i>         | Parsley Cheilosia            | Diptera | SAMEA7746768 | Female  | WHOLE ORGANISM   |
| <i>Cheilosia soror</i>          | Red-horned Truffle Cheilosia | Diptera | SAMEA7520031 | Female  | WHOLE ORGANISM   |
| <i>Cheilosia vulpina</i>        | Large Burdock Cheilosia      | Diptera | SAMEA7746587 | Female  | THORAX           |
| <i>Chrysotoxum bicinctum</i>    | Two-banded wasp hoverfly     | Diptera | SAMEA7520032 | Female  | HEAD   THORAX    |
| <i>Chrysotoxum verralli</i>     | Verrall's wasp hoverfly      | Diptera | SAMEA7520033 | Female  | THORAX           |
| <i>Criorhina berberina</i>      | Dimorphic Bear Hoverfly      | Diptera | SAMEA7701563 | Female  | ABDOMEN          |
| <i>Epistrophe grossulariae</i>  | Broad-banded Epistrophe      | Diptera | SAMEA8603153 | Female  | ABDOMEN          |
| <i>Episyrrhus balteatus</i>     | Marmalade hoverfly           | Diptera | SAMEA7520035 | Unknown | HEAD   THORAX    |
| <i>Eristalinus sepulchralis</i> | Small Spotty-eyed Dronefly   | Diptera | SAMEA7746477 | Female  | THORAX           |
| <i>Eristalis arbustorum</i>     | Plane-faced dronefly         | Diptera | SAMEA7520036 | Female  | HEAD   THORAX    |
| <i>Eristalis horticola</i>      |                              | Diptera | SAMEA7702268 | Female  | WHOLE ORGANISM   |
| <i>Eristalis pertinax</i>       | Tapered Dronefly             | Diptera | SAMEA7520039 | Male    | HEAD   THORAX    |
| <i>Eristalis tenax</i>          | Common Dronefly              | Diptera | SAMEA7520042 | Female  | HEAD   THORAX    |
| <i>Eupeodes corollae</i>        |                              | Diptera | SAMEA7524255 | Female  | THORAX   ABDOMEN |
| <i>Eupeodes latifasciatus</i>   | Meadow Field Syrph           | Diptera | SAMEA7746776 | Female  | THORAX           |
| <i>Leucozona laternaria</i>     | Dark-saddled Leucozona       | Diptera | SAMEA8603164 | Female  | THORAX           |
| <i>Melanostoma mellinum</i>     | Dumpy grass hoverfly         | Diptera | SAMEA7520051 | Male    | HEAD   THORAX    |
| <i>Melanostoma scalare</i>      | Slender grass hoverfly       | Diptera | SAMEA7520053 | Male    | HEAD   THORAX    |
| <i>Myathropa florea</i>         | Batman hoverfly              | Diptera | SAMEA7520156 | Male    | HEAD   THORAX    |
| <i>Platycheirus albimanus</i>   | White-footed hoverfly        | Diptera | SAMEA7520157 | Female  | HEAD   THORAX    |
| <i>Rhingia campestris</i>       | Common Snout-hoverfly        | Diptera | SAMEA7520159 | Male    | ABDOMEN          |
| <i>Scaeva pyrastris</i>         | Pied hoverfly                | Diptera | SAMEA7520160 | Female  | HEAD   THORAX    |
| <i>Sphaerophoria taeniata</i>   |                              | Diptera | SAMEA7746606 | Male    | THORAX   ABDOMEN |

|                                   |                             |               |              |         |                         |
|-----------------------------------|-----------------------------|---------------|--------------|---------|-------------------------|
| <i>Volucella inanis</i>           | Lesser hornet hoverfly      | Diptera       | SAMEA7520171 | Female  | HEAD   THORAX           |
| <i>Volucella inflata</i>          | Cossus Hoverfly             | Diptera       | SAMEA7701275 | Male    | ABDOMEN                 |
| <i>Xanthogramma pedissequum</i>   | Superb ant-hill hoverfly    | Diptera       | SAMEA7520951 | Male    | THORAX                  |
| <i>Xylota sylvarum</i>            | Golden-tailed hoverfly      | Diptera       | SAMEA7520173 | Male    | HEAD   THORAX           |
| <i>Cistogaster globosa</i>        |                             | Diptera       | SAMEA7746478 | Male    | WHOLE ORGANISM          |
| <i>Gymnosoma rotundatum</i>       |                             | Diptera       | SAMEA7849381 | Male    | THORAX                  |
| <i>Nowickia ferox</i>             |                             | Diptera       | SAMEA7746479 | Female  | THORAX                  |
| <i>Thecocarcelia acutangulata</i> |                             | Diptera       | SAMEA7746598 | Female  | THORAX                  |
| <i>Anomoia purmunda</i>           | Hawthorn fruitfly           | Diptera       | SAMEA7520325 | Female  | WHOLE ORGANISM          |
| <i>Merzomyia westermanni</i>      |                             | Diptera       | SAMEA7746463 | Unknown | THORAX   ABDOMEN        |
| <i>Terellia serratulae</i>        |                             | Diptera       | SAMEA7520334 | Female  | WHOLE ORGANISM          |
| <i>Bibio marci</i>                | St Mark's Fly               | Diptera       | SAMEA7524263 | Male    | ABDOMEN                 |
| <i>Nephrotoma flavescens</i>      | Tiger Cranefly              | Diptera       | SAMEA7520954 | Male    | WHOLE ORGANISM          |
| <i>Cloeon dipterum</i>            | Pond Olive                  | Ephemeroptera | SAMEA7520803 | Unknown | WHOLE ORGANISM          |
| <i>Ecdyonurus torrentis</i>       | Large brook dun             | Ephemeroptera | SAMEA7520824 | Unknown | THORAX   POSTERIOR_BODY |
| <i>Rhithrogena germanica</i>      |                             | Ephemeroptera | SAMEA9065858 | Unknown | ANTERIOR_BODY           |
| <i>Acanthosoma haemorrhoidale</i> | Hawthorn shieldbug          | Hemiptera     | SAMEA8563710 | Male    | ABDOMEN                 |
| <i>Gonocerus acuteangulatus</i>   | Box Bug                     | Hemiptera     | SAMEA7524254 | Unknown | THORAX   ABDOMEN        |
| <i>Pantilius tunicatus</i>        |                             | Hemiptera     | SAMEA7520359 | Unknown | HEAD   THORAX           |
| <i>Himacerus mirmicoides</i>      | Ant damselbug               | Hemiptera     | SAMEA7520349 | Unknown | WHOLE ORGANISM          |
| <i>Notonecta glauca</i>           | Backswimmer / Water Boatman | Hemiptera     | SAMEA7520812 | Unknown | WHOLE ORGANISM          |
| <i>Icerya purchasi</i>            | cottony cushion scale       | Hemiptera     | SAMEA7523480 | Female  | WHOLE ORGANISM          |
| <i>Aelia acuminata</i>            | Bishop's mitre shieldbug    | Hemiptera     | SAMEA7520338 | Male    | WHOLE ORGANISM          |
| <i>Eurydema oleracea</i>          | Brassica shieldbug          | Hemiptera     | SAMEA7701485 | Unknown | WHOLE ORGANISM          |
| <i>Planococcus citri</i>          | citrus mealybug             | Hemiptera     | SAMEA7523510 | Female  | WHOLE ORGANISM          |
| <i>Andrena dorsata</i>            | Short-fringed Mining Bee    | Hymenoptera   | SAMEA7746464 | Female  | THORAX                  |
| <i>Andrena haemorrhoa</i>         | Red-tailed mining bee       | Hymenoptera   | SAMEA7520535 | Female  | ABDOMEN                 |
| <i>Andrena hattorfiana</i>        | Large scabious mining bee   | Hymenoptera   | SAMEA7746468 | Female  | THORAX                  |
| <i>Bombus campestris</i>          | Field cuckoo-bee            | Hymenoptera   | SAMEA7520482 | Male    | HEAD   THORAX           |
| <i>Bombus hortorum</i>            | Garden bumblebee            | Hymenoptera   | SAMEA7520483 | Female  | HEAD   THORAX           |
| <i>Bombus hypnorum</i>            | Tree bumblebee              | Hymenoptera   | SAMEA7520655 | Male    | HEAD   THORAX           |

|                                 |                              |             |              |         |                  |
|---------------------------------|------------------------------|-------------|--------------|---------|------------------|
| <i>Bombus pascuorum</i>         | Common carder bee            | Hymenoptera | SAMEA7520484 | Female  | HEAD   THORAX    |
| <i>Bombus pratorum</i>          | Early bumblebee              | Hymenoptera | SAMEA7520485 | Female  | HEAD   THORAX    |
| <i>Bombus sylvestris</i>        | Forest cuckoo bee            | Hymenoptera | SAMEA7520657 | Male    | HEAD   THORAX    |
| <i>Bombus terrestris</i>        | buff-tailed bumblebee        | Hymenoptera | SAMEA7520487 | Female  | HEAD   THORAX    |
| <i>Nomada fabriciana</i>        | Fabricius' Nomad Bee         | Hymenoptera | SAMEA7520701 | Female  | WHOLE ORGANISM   |
| <i>Hylaeus communis</i>         | Common Yellow-face Bee       | Hymenoptera | SAMEA7746754 | Female  | WHOLE ORGANISM   |
| <i>Cerceris rybyensis</i>       | Ornate Tailed Digger Wasp    | Hymenoptera | SAMEA7701329 | Female  | ABDOMEN          |
| <i>Ectemnius continuus</i>      |                              | Hymenoptera | SAMEA7520490 | Female  | HEAD   THORAX    |
| <i>Ectemnius lituratus</i>      |                              | Hymenoptera | SAMEA7520491 | Female  | HEAD   THORAX    |
| <i>Mimumesa dahlbomi</i>        |                              | Hymenoptera | SAMEA8603165 | Male    | WHOLE ORGANISM   |
| <i>Nysson spinosus</i>          | Large Spurred Digger Wasp    | Hymenoptera | SAMEA7520702 | Female  | HEAD   THORAX    |
| <i>Pemphredon lugubris</i>      | Mournful Wasp                | Hymenoptera | SAMEA8603139 | Unknown | THORAX           |
| <i>Trypoxylon clavicerum</i>    | Club Horned Wood Borer Wasp  | Hymenoptera | SAMEA7701565 | Female  | WHOLE ORGANISM   |
| <i>Myrmica sabuleti</i>         |                              | Hymenoptera | SAMEA7520497 | Female  | WHOLE ORGANISM   |
| <i>Lasioglossum calceatum</i>   | Common furrow bee            | Hymenoptera | SAMEA7849393 | Unknown | WHOLE ORGANISM   |
| <i>Lasioglossum lativentre</i>  | Furry-claspered furrow bee   | Hymenoptera | SAMEA7746765 | Male    | WHOLE ORGANISM   |
| <i>Lasioglossum leucozonium</i> | White-zoned furrow bee       | Hymenoptera | SAMEA7746759 | Male    | WHOLE ORGANISM   |
| <i>Lasioglossum malachurum</i>  | Sharp-collared furrow bee    | Hymenoptera | SAMEA7746751 | Female  | WHOLE ORGANISM   |
| <i>Lasioglossum morio</i>       | Common green furrow bee      | Hymenoptera | SAMEA7746456 | Male    | WHOLE ORGANISM   |
| <i>Lasioglossum pauxillum</i>   | Base-banded furrow bee       | Hymenoptera | SAMEA7520494 | Female  | WHOLE ORGANISM   |
| <i>Seladonia tumulorum</i>      | Bronze furrow bee            | Hymenoptera | SAMEA7746445 | Male    | WHOLE ORGANISM   |
| <i>Sphecodes ephippius</i>      | Bare-saddled blood bee       | Hymenoptera | SAMEA7746758 | Male    | WHOLE ORGANISM   |
| <i>Sphecodes monilicornis</i>   | Box-headed blood bee         | Hymenoptera | SAMEA7746755 | Male    | THORAX           |
| <i>Amblyteles armatorius</i>    |                              | Hymenoptera | SAMEA7520946 | Male    | THORAX   ABDOMEN |
| <i>Buathra laborator</i>        |                              | Hymenoptera | SAMEA8534297 | Unknown | THORAX           |
| <i>Ichneumon xanthorius</i>     |                              | Hymenoptera | SAMEA7746465 | Female  | THORAX           |
| <i>Ophion luteus</i>            |                              | Hymenoptera | SAMEA8534284 | Female  | ABDOMEN          |
| <i>Scambus nigricans</i>        |                              | Hymenoptera | SAMEA7849231 | Female  | WHOLE ORGANISM   |
| <i>Megachile ligniseca</i>      | Wood-carving leaf-cutter bee | Hymenoptera | SAMEA7520495 | Female  | WHOLE ORGANISM   |
| <i>Megachile willughbiella</i>  | Willughby's leaf-cutter bee  | Hymenoptera | SAMEA7520496 | Female  | WHOLE ORGANISM   |
| <i>Macropis europaea</i>        | Yellow loosestrife Bee       | Hymenoptera | SAMEA7746440 | Male    | THORAX           |

|                                  |                       |             |              |         |                  |
|----------------------------------|-----------------------|-------------|--------------|---------|------------------|
| <i>Anoplius nigerrimus</i>       |                       | Hymenoptera | SAMEA7746764 | Unknown | THORAX           |
| <i>Evagetes crassicornis</i>     |                       | Hymenoptera | SAMEA7746601 | Unknown | WHOLE ORGANISM   |
| <i>Athalia circularis</i>        |                       | Hymenoptera | SAMEA7746777 | Unknown | WHOLE ORGANISM   |
| <i>Athalia cordata</i>           |                       | Hymenoptera | SAMEA7746763 | Unknown | WHOLE ORGANISM   |
| <i>Athalia rosae</i>             | Coleseed sawfly       | Hymenoptera | SAMEA7520481 | Unknown | ABDOMEN          |
| <i>Tenthredo livida</i>          |                       | Hymenoptera | SAMEA7520699 | Unknown | HEAD   THORAX    |
| <i>Tenthredo notha</i>           |                       | Hymenoptera | SAMEA7746761 | Unknown | THORAX           |
| <i>Tiphia femorata</i>           | Beetle killing wasp   | Hymenoptera | SAMEA7520499 | Female  | WHOLE ORGANISM   |
| <i>Ancistrocerus nigricornis</i> | Early mason-wasp      | Hymenoptera | SAMEA7746762 | Female  | THORAX           |
| <i>Dolichovespula media</i>      | Median wasp           | Hymenoptera | SAMEA7520488 | Female  | HEAD   THORAX    |
| <i>Dolichovespula saxonica</i>   | Saxon wasp            | Hymenoptera | SAMEA7520489 | Male    | HEAD   THORAX    |
| <i>Dolichovespula sylvestris</i> | Tree wasp             | Hymenoptera | SAMEA7746475 | Male    | THORAX           |
| <i>Vespa crabro</i>              | European hornet       | Hymenoptera | SAMEA7520500 | Female  | THORAX           |
| <i>Vespula germanica</i>         | German wasp           | Hymenoptera | SAMEA7520501 | Female  | HEAD   THORAX    |
| <i>Vespula vulgaris</i>          | Common wasp           | Hymenoptera | SAMEA7520502 | Female  | HEAD   THORAX    |
| <i>Chrysoperla carnea</i>        | Common green lacewing | Neuroptera  | SAMEA7520372 | Female  | WHOLE ORGANISM   |
| <i>Ischnura elegans</i>          | Blue-tailed damselfly | Odonata     | SAMEA7521125 | Female  | WHOLE ORGANISM   |
| <i>Sympetrum striolatum</i>      | Common darter         | Odonata     | SAMEA7520376 | Female  | HEAD   THORAX    |
| <i>Chorthippus brunneus</i>      | Field grasshopper     | Orthoptera  | SAMEA7520377 | Unknown | HEAD             |
| <i>Chorthippus parallelus</i>    | Meadow grasshopper    | Orthoptera  | SAMEA7520378 | Unknown | HEAD             |
| <i>Teleogryllus oceanicus</i>    | Black field cricket   | Orthoptera  | SAMEA8023467 | Female  | WHOLE ORGANISM   |
| <i>Meconema thalassinum</i>      | Oak bush-cricket      | Orthoptera  | SAMEA7520379 | Male    | THORAX   ABDOMEN |
| <i>Leuctra nigra</i>             |                       | Plecoptera  | SAMEA7521360 | Male    | WHOLE ORGANISM   |
| <i>Nemoura dubitans</i>          |                       | Plecoptera  | SAMEA9065873 | Female  | WHOLE ORGANISM   |
| <i>Nemurella pictetii</i>        |                       | Plecoptera  | SAMEA7520996 | Male    | WHOLE ORGANISM   |
| <i>Glyphotaelius pellucidus</i>  |                       | Trichoptera | SAMEA7520965 | Male    | WHOLE ORGANISM   |
| <i>Limnephilus lunatus</i>       |                       | Trichoptera | SAMEA7521206 | Female  | WHOLE ORGANISM   |
| <i>Limnephilus marmoratus</i>    |                       | Trichoptera | SAMEA7520990 | Male    | WHOLE ORGANISM   |
| <i>Limnephilus rhombicus</i>     |                       | Trichoptera | SAMEA7849396 | Male    | ABDOMEN          |
| <i>Polycentropus irroratus</i>   |                       | Trichoptera | SAMEA9065840 | Unknown | ANTERIOR_BODY    |
