# Supplementary material for: Phylogenomic analysis of Wolbachia genomes from the Darwin Tree of Life biodiversity genomics project
Source: PubMed Central journal article supplement (PMC9894559; doi:10.1371/journal.pbio.3001972), 2023-01-23
Supplement: pbio.3001972.s003.pdf [file pbio.3001972.s003.pdf]

S2 Table. Overview of all detected *Wolbachia* infections

| Scientific name host            | Taxonomic order host | Wolbachia supergroup                                                           | Circular / linear | Coverage | Number of contigs | Genome size (bp) | BUSCO completeness                          | Assembly method | Estimated number of Wolbachia genomes | Estimated number of Wolbachia genomes per host | Accession number |
|---------------------------------|----------------------|--------------------------------------------------------------------------------|-------------------|----------|-------------------|------------------|---------------------------------------------|-----------------|---------------------------------------|------------------------------------------------|------------------|
| <i>Agriphila straminella</i>    | Lepidoptera          | B                                                                              | circular          | 42       | 1                 | 1856314          | C:99.4%[S:98.9%,D:0.5%],F:0.0%,M:0.6%,n:364 | hifiasm         | 2                                     | 2                                              | GCA_947250755    |
| <i>Agriphila tristella</i>      | Lepidoptera          | B                                                                              | linear            | 135      | 2                 | 1312870          | C:99.8%[S:99.5%,D:0.3%],F:0.0%,M:0.2%,n:364 | flye            | 9                                     | 9                                              | GCA_947179465    |
| <i>Aporia crataegi</i>          | Lepidoptera          | B                                                                              | linear            | 303      | 1                 | 1310109          | C:99.7%[S:99.7%,D:0.0%],F:0.0%,M:0.3%,n:364 | flye            | 6                                     | 6                                              | GCA_947250485    |
| <i>Apotomis betuletana</i>      | Lepidoptera          | B                                                                              | linear            | 28       | 1                 | 1635810          | C:99.7%[S:98.9%,D:0.8%],F:0.0%,M:0.3%,n:364 | hifiasm         | 2                                     | 2                                              | GCA_947250475    |
| <i>Apotomis turbidana</i>       | Lepidoptera          | B                                                                              | circular          | 51       | 1                 | 1525756          | C:99.4%[S:98.9%,D:0.5%],F:0.3%,M:0.3%,n:364 | hifiasm         | 3                                     | 3                                              | GCA_947251835    |
| <i>Archips podanus</i>          | Lepidoptera          | B                                                                              | circular          | 50       | 1                 | 1806407          | C:99.4%[S:98.9%,D:0.5%],F:0.3%,M:0.3%,n:364 | hifiasm         | 4                                     | 4                                              | GCA_947250705    |
| <i>Aricia agestis</i>           | Lepidoptera          | B                                                                              | linear            | 115      | 2                 | 1562496          | C:99.7%[S:98.9%,D:0.8%],F:0.0%,M:0.3%,n:364 | hifiasm         | 4                                     | 4                                              | GCA_947179385    |
| <i>Autographa gamma</i>         | Lepidoptera          | Not well assembled - unclear number of Wolbachia strains                       |                   |          |                   |                  |                                             |                 |                                       |                                                |                  |
|                                 |                      | A                                                                              | circular          | 78       | 1                 | 1594318          | C:99.5%[S:99.2%,D:0.3%],F:0.0%,M:0.5%,n:364 | flye            | 4                                     | 9                                              | GCA_947251935    |
| <i>Calamotropha paludella</i>   | Lepidoptera          | A                                                                              | circular          | 85       | 1                 | 1378301          | C:99.5%[S:99.2%,D:0.3%],F:0.0%,M:0.5%,n:364 | flye            | 5                                     |                                                | GCA_947251525    |
| <i>Campaea margaritaria</i>     | Lepidoptera          | B                                                                              | circular          | 456      | 1                 | 1507682          | C:99.7%[S:99.2%,D:0.5%],F:0.0%,M:0.3%,n:364 | flye            | 19                                    | 19                                             | GCA_947250595    |
| <i>Campylogramma bilineatum</i> | Lepidoptera          | B                                                                              | circular          | 41       | 1                 | 1668206          | C:99.2%[S:98.4%,D:0.8%],F:0.0%,M:0.8%,n:364 | hifiasm         | 2                                     | 2                                              | GCA_947251825    |
| <i>Carcina quercana</i>         | Lepidoptera          | B                                                                              | linear            | 18       | 4                 | 1572160          | C:99.8%[S:99.5%,D:0.3%],F:0.0%,M:0.2%,n:364 | flye            | 1                                     | 1                                              | GCA_947179375    |
| <i>Catoptria pinella</i>        | Lepidoptera          | B                                                                              | circular          | 83       | 1                 | 1667357          | C:99.8%[S:99.5%,D:0.3%],F:0.0%,M:0.2%,n:364 | hifiasm         | 3                                     | 3                                              | GCA_947250515    |
| <i>Celastrina argiolus</i>      | Lepidoptera          | B                                                                              | circular          | 140      | 1                 | 1329046          | C:99.7%[S:99.7%,D:0.0%],F:0.0%,M:0.3%,n:364 | hifiasm         | 9                                     | 9                                              | GCA_947251805    |
| <i>Chrysoteuchia culmella</i>   | Lepidoptera          | Not well assembled - unclear number of Wolbachia strains                       |                   |          |                   |                  |                                             |                 |                                       |                                                |                  |
| <i>Colias croceus</i>           | Lepidoptera          | B                                                                              | circular          | 158      | 1                 | 1396841          | C:99.8%[S:99.5%,D:0.3%],F:0.0%,M:0.2%,n:364 | hifiasm         | 5                                     | 5                                              | GCA_947250525    |
| <i>Cydia splendana</i>          | Lepidoptera          | A                                                                              | linear            | 154      | 2                 | 1446399          | C:98.9%[S:98.6%,D:0.3%],F:0.3%,M:0.8%,n:364 | flye            | 9                                     | 9                                              | GCA_947179475    |
| <i>Emmelina monodactyla</i>     | Lepidoptera          | B                                                                              | circular          | 177      | 1                 | 1385743          | C:99.7%[S:99.7%,D:0.0%],F:0.0%,M:0.3%,n:364 | hifiasm         | 9                                     | 9                                              | GCA_947251605    |
|                                 |                      | A                                                                              | circular          | 18       | 1                 | 1691857          | C:99.5%[S:99.2%,D:0.3%],F:0.0%,M:0.5%,n:364 | hifiasm         | 2                                     | 4                                              | GCA_947250805    |
| <i>Endotricha flammealis</i>    | Lepidoptera          | B                                                                              | circular          | 18       | 1                 | 1747616          | C:99.7%[S:99.2%,D:0.5%],F:0.0%,M:0.3%,n:364 | hifiasm         | 2                                     |                                                | GCA_947251735    |
|                                 |                      | A                                                                              | circular          | 315      | 1                 | 1431999          | C:99.2%[S:98.9%,D:0.3%],F:0.3%,M:0.5%,n:364 | hifiasm         | 13                                    | 19                                             | GCA_947251745    |
| <i>Epagoge grotiana</i>         | Lepidoptera          | A                                                                              | circular          | 135      | 1                 | 1781589          | C:98.6%[S:98.6%,D:0.0%],F:0.5%,M:0.9%,n:364 | hifiasm         | 6                                     |                                                | GCA_947251775    |
| <i>Epirrhoe alternata</i>       | Lepidoptera          | A                                                                              | circular          | 608      | 1                 | 1197406          | C:98.9%[S:98.9%,D:0.0%],F:0.0%,M:1.1%,n:364 | hifiasm         | 23                                    | 23                                             | GCA_947251475    |
| <i>Erebia ligea</i>             | Lepidoptera          | B                                                                              | linear            | 33       | 4                 | 1520330          | C:98.9%[S:98.4%,D:0.5%],F:0.0%,M:1.1%,n:364 | flye            | 2                                     | 2                                              | GCA_947179575    |
| <i>Erynnis tages</i>            | Lepidoptera          | B                                                                              | linear            | 113      | 1                 | 1532960          | C:99.8%[S:99.5%,D:0.3%],F:0.0%,M:0.2%,n:364 | hifiasm         | 8                                     | 8                                              | GCA_947250545    |
| <i>Eucosma cana</i>             | Lepidoptera          | B                                                                              | circular          | 133      | 1                 | 1407592          | C:98.9%[S:98.4%,D:0.5%],F:0.5%,M:0.6%,n:364 | hifiasm         | 6                                     | 6                                              | GCA_947250645    |
| <i>Euphydryas aurinia</i>       | Lepidoptera          | B                                                                              | circular          | 209      | 1                 | 1802478          | C:99.7%[S:98.6%,D:1.1%],F:0.0%,M:0.3%,n:364 | hifiasm         | 12                                    | 12                                             | GCA_947250535    |
| <i>Eupithecia tripunctaria</i>  | Lepidoptera          | A                                                                              | circular          | 31       | 1                 | 1478720          | C:99.4%[S:98.9%,D:0.5%],F:0.0%,M:0.6%,n:364 | hifiasm         | 2                                     | 2                                              | GCA_947251595    |
| <i>Hamearis lucina</i>          | Lepidoptera          | Not well assembled - unclear number of Wolbachia strains                       |                   |          |                   |                  |                                             |                 |                                       |                                                |                  |
| <i>Hedya salicella</i>          | Lepidoptera          | Not well assembled - unclear number of Wolbachia strains + not enough coverage |                   |          |                   |                  |                                             |                 |                                       |                                                |                  |
| <i>Hesperia comma</i>           | Lepidoptera          | Not well assembled - not enough coverage                                       |                   |          |                   |                  |                                             |                 |                                       |                                                |                  |
| <i>Hylaea fasciaria</i>         | Lepidoptera          | B                                                                              | circular          | 772      | 1                 | 1307822          | C:99.7%[S:99.7%,D:0.0%],F:0.0%,M:0.3%,n:364 | flye            | 22                                    | 22                                             | GCA_947251975    |
| <i>Hypana proboscidalis</i>     | Lepidoptera          | Not well assembled - high number of detected SNPs with 10x data                |                   |          |                   |                  |                                             |                 |                                       |                                                |                  |
| <i>Idaea aversata</i>           | Lepidoptera          | B                                                                              | linear            | 135      | 2                 | 1828659          | C:99.4%[S:98.9%,D:0.5%],F:0.0%,M:0.6%,n:364 | hifiasm         | 5                                     | 5                                              | GCA_947179535    |
| <i>Laothoe populi</i>           | Lepidoptera          | Not well assembled - unclear number of Wolbachia strains                       |                   |          |                   |                  |                                             |                 |                                       |                                                |                  |
| <i>Leptidea sinapis</i>         | Lepidoptera          | B                                                                              | linear            | 77       | 4                 | 1438040          | C:99.5%[S:99.2%,D:0.3%],F:0.3%,M:0.2%,n:364 | flye            | 4                                     | 4                                              | GCA_947179455    |

|                                 |             |                                                          |          |     |   |         |                                             |              |    |    |               |
|---------------------------------|-------------|----------------------------------------------------------|----------|-----|---|---------|---------------------------------------------|--------------|----|----|---------------|
| <i>Lycaena phlaeas</i>          | Lepidoptera | B                                                        | circular | 24  | 1 | 1312316 | C:99.7%[S:99.7%,D:0.0%],F:0.0%,M:0.3%,n:364 | hifiasm-meta | 1  | 1  | GCA_947251875 |
| <i>Melanargia galathea</i>      | Lepidoptera | B                                                        | circular | 94  | 1 | 1550695 | C:99.7%[S:99.2%,D:0.5%],F:0.0%,M:0.3%,n:364 | flye         | 7  | 7  | /             |
| <i>Nymphalis c-album</i>        | Lepidoptera | B                                                        | circular | 161 | 1 | 1381694 | C:99.7%[S:99.7%,D:0.0%],F:0.0%,M:0.3%,n:364 | hifiasm      | 8  | 10 | GCA_947250815 |
|                                 |             | B                                                        | circular | 43  | 1 | 1236246 | C:99.7%[S:99.7%,D:0.0%],F:0.0%,M:0.3%,n:364 | hifiasm      | 2  |    | GCA_947250465 |
| <i>Ochlodes sylvanus</i>        | Lepidoptera | B                                                        | linear   | 27  | 2 | 1713863 | C:99.4%[S:98.9%,D:0.5%],F:0.0%,M:0.6%,n:364 | flye         | 2  | 2  | GCA_947179425 |
| <i>Opisthograptis luteolata</i> | Lepidoptera | Not well assembled - unclear number of Wolbachia strains |          |     |   |         |                                             |              |    |    |               |
| <i>Orgyia antiqua</i>           | Lepidoptera | B                                                        | linear   | 258 | 1 | 1546986 | C:99.7%[S:99.2%,D:0.5%],F:0.0%,M:0.3%,n:364 | flye         | 10 | 10 | /             |
| <i>Pammene fasciana</i>         | Lepidoptera | B                                                        | circular | 103 | 1 | 1266982 | C:99.7%[S:99.7%,D:0.0%],F:0.0%,M:0.3%,n:364 | hifiasm      | 6  | 6  | GCA_947251495 |
| <i>Pandemis cinnamomeana</i>    | Lepidoptera | B                                                        | linear   | 34  | 4 | 1779235 | C:99.7%[S:99.2%,D:0.5%],F:0.0%,M:0.3%,n:364 | flye         | 2  | 2  | GCA_947179145 |
| <i>Pandemis corylana</i>        | Lepidoptera | B                                                        | circular | 193 | 1 | 1510264 | C:99.4%[S:98.6%,D:0.8%],F:0.3%,M:0.3%,n:364 | flye         | 8  | 8  | GCA_947250555 |
| <i>Parapoynx stratiotata</i>    | Lepidoptera | B                                                        | circular | 14  | 1 | 1545403 | C:99.7%[S:99.2%,D:0.5%],F:0.0%,M:0.3%,n:364 | hifiasm      | 1  | 1  | GCA_947250635 |
| <i>Pararge aegeria</i>          | Lepidoptera | B                                                        | circular | 107 | 1 | 1332905 | C:99.7%[S:99.7%,D:0.0%],F:0.0%,M:0.3%,n:364 | hifiasm      | 5  | 5  | GCA_947250725 |
| <i>Phalera bucephala</i>        | Lepidoptera | A                                                        | circular | 62  | 1 | 1271809 | C:99.2%[S:98.9%,D:0.3%],F:0.0%,M:0.8%,n:364 | hifiasm      | 4  | 21 | GCA_947250505 |
|                                 |             | B                                                        | linear   | 272 | 1 | 1358027 | C:99.5%[S:99.5%,D:0.0%],F:0.3%,M:0.2%,n:364 | hifiasm      | 16 |    | GCA_947251625 |
|                                 |             | B                                                        | linear   | 9   | 1 | 1462983 | C:99.2%[S:98.9%,D:0.3%],F:0.3%,M:0.5%,n:364 | hifiasm      | 1  |    | GCA_947251535 |
| <i>Pheosia gnoma</i>            | Lepidoptera | A                                                        | circular | 393 | 1 | 1353731 | C:99.5%[S:99.5%,D:0.0%],F:0.0%,M:0.5%,n:364 | hifiasm      | 13 | 13 | GCA_947251565 |
| <i>Pheosia tremula</i>          | Lepidoptera | B                                                        | circular | 243 | 1 | 1268782 | C:99.2%[S:99.2%,D:0.0%],F:0.5%,M:0.3%,n:364 | hifiasm      | 7  | 7  | GCA_947251655 |
| <i>Polyommatus icarus</i>       | Lepidoptera | B                                                        | linear   | 333 | 1 | 1574132 | C:99.8%[S:99.5%,D:0.3%],F:0.0%,M:0.2%,n:364 | hifiasm      | 19 | 19 | GCA_947250745 |
| <i>Pyrgus malvae</i>            | Lepidoptera | B                                                        | circular | 254 | 1 | 1544873 | C:99.1%[S:98.6%,D:0.5%],F:0.5%,M:0.4%,n:364 | flye         | 7  | 7  | GCA_947250605 |
| <i>Rhopobota naevana</i>        | Lepidoptera | B                                                        | circular | 13  | 1 | 1771993 | C:99.5%[S:98.4%,D:1.1%],F:0.0%,M:0.5%,n:364 | hifiasm      | 1  | 1  | GCA_947250615 |
| <i>Thymelicus sylvestris</i>    | Lepidoptera | B                                                        | linear   | 960 | 1 | 1286255 | C:99.7%[S:99.7%,D:0.0%],F:0.0%,M:0.3%,n:364 | flye         | 48 | 48 | GCA_947251505 |
| <i>Watsonalla binaria</i>       | Lepidoptera | B                                                        | circular | 218 | 1 | 1651336 | C:99.7%[S:99.2%,D:0.5%],F:0.0%,M:0.3%,n:364 | hifiasm      | 6  | 6  | GCA_947250655 |
| <i>Xestia c-nigrum</i>          | Lepidoptera | B                                                        | circular | 106 | 1 | 1372378 | C:99.7%[S:99.7%,D:0.0%],F:0.0%,M:0.3%,n:364 | hifiasm      | 6  | 6  | GCA_947250675 |
| <i>Yponomeuta plumbellus</i>    | Lepidoptera | A                                                        | linear   | 181 | 1 | 1418562 | C:98.9%[S:98.9%,D:0.0%],F:0.5%,M:0.6%,n:364 | hifiasm      | 12 | 12 | GCA_947251575 |
| <i>Apoderus coryli</i>          | Coleoptera  | A                                                        | circular | 31  | 1 | 1535196 | C:99.8%[S:99.5%,D:0.3%],F:0.0%,M:0.2%,n:364 | flye         | 1  | 1  | GCA_947251615 |
| <i>Nebria salina</i>            | Coleoptera  | Not well assembled - very high coverage (>1000x)         |          |     |   |         |                                             |              |    |    |               |
| <i>Rhinocyllus conicus</i>      | Coleoptera  | A                                                        | circular | 123 | 1 | 1703908 | C:99.2%[S:98.4%,D:0.8%],F:0.3%,M:0.5%,n:364 | flye         | 5  | 5  | GCA_947250775 |
| <i>Philonthus cognatus</i>      | Coleoptera  | A                                                        | circular | 25  | 1 | 1811324 | C:99.4%[S:98.9%,D:0.5%],F:0.0%,M:0.6%,n:364 | hifiasm      | 2  | 4  | GCA_947251755 |
|                                 |             | B                                                        | linear   | 25  | 2 | 1680410 | C:99.8%[S:98.4%,D:1.4%],F:0.0%,M:0.2%,n:364 | hifiasm      | 2  |    | GCA_947179345 |
| <i>Acrocera orbiculus</i>       | Diptera     | A                                                        | circular | 121 | 1 | 1383045 | C:98.6%[S:98.6%,D:0.0%],F:0.3%,M:1.1%,n:364 | hifiasm      | 2  | 2  | GCA_947250015 |
| <i>Bomblylius major</i>         | Diptera     | A                                                        | circular | 173 | 1 | 1556587 | C:99.4%[S:98.6%,D:0.8%],F:0.0%,M:0.6%,n:364 | flye         | 5  | 5  | GCA_947251895 |
| <i>Protocalliphora azurea</i>   | Diptera     | A                                                        | circular | 117 | 1 | 1434286 | C:99.2%[S:99.2%,D:0.0%],F:0.3%,M:0.5%,n:364 | flye         | 6  | 21 | GCA_947251425 |
|                                 |             | B                                                        | circular | 291 | 1 | 1550351 | C:99.5%[S:99.2%,D:0.3%],F:0.3%,M:0.2%,n:364 | flye         | 15 |    | GCA_947251865 |
| <i>Sicus ferrugineus</i>        | Diptera     | A                                                        | circular | 119 | 1 | 1273941 | C:99.5%[S:99.5%,D:0.0%],F:0.3%,M:0.2%,n:364 | hifiasm      | 5  | 5  | GCA_947251515 |
| <i>Thecophora atra</i>          | Diptera     | Not well assembled - unclear number of Wolbachia strains |          |     |   |         |                                             |              |    |    |               |
| <i>Coremacera marginata</i>     | Diptera     | A                                                        | circular | 115 | 1 | 1387347 | C:99.2%[S:99.2%,D:0.0%],F:0.3%,M:0.5%,n:364 | hifiasm      | 9  | 9  | GCA_947251955 |
| <i>Baccha elongata</i>          | Diptera     | Not well assembled - unclear number of Wolbachia strains |          |     |   |         |                                             |              |    |    |               |
| <i>Cheilosia soror</i>          | Diptera     | A                                                        | circular | 86  | 1 | 1368131 | C:99.4%[S:98.9%,D:0.5%],F:0.0%,M:0.6%,n:364 | hifiasm      | 4  | 9  | GCA_947250625 |
|                                 |             | A                                                        | linear   | 96  | 2 | 1493041 | C:99.2%[S:99.2%,D:0.0%],F:0.0%,M:0.8%,n:364 | hifiasm      | 5  |    | GCA_947179435 |
| <i>Cheilosia vulpina</i>        | Diptera     | Not well assembled - unclear number of Wolbachia strains |          |     |   |         |                                             |              |    |    |               |
| <i>Chrysotoxum verralli</i>     | Diptera     | Not well assembled - unclear number of Wolbachia strains |          |     |   |         |                                             |              |    |    |               |
| <i>Epistrophe grossulariae</i>  | Diptera     | A                                                        | circular | 23  | 1 | 1483878 | C:99.4%[S:98.6%,D:0.8%],F:0.3%,M:0.3%,n:364 | flye         | 2  | 3  | GCA_947251925 |
|                                 |             | A                                                        | circular | 20  | 1 | 1367569 | C:99.2%[S:98.9%,D:0.3%],F:0.3%,M:0.5%,n:364 | flye         | 1  |    | GCA_947251435 |

|                                  |             |                                                                 |          |      |   |         |                                             |         |    |    |               |
|----------------------------------|-------------|-----------------------------------------------------------------|----------|------|---|---------|---------------------------------------------|---------|----|----|---------------|
| <i>Episyrphus balteatus</i>      | Diptera     | B                                                               | circular | 80   | 1 | 1402289 | C:99.2%[S:98.4%,D:0.8%],F:0.5%,M:0.3%,n:364 | hifiasm | 6  | 6  | GCA_947250575 |
| <i>Eupeodes latifasciatus</i>    | Diptera     | B                                                               | circular | 406  | 1 | 1274269 | C:99.7%[S:99.7%,D:0.0%],F:0.0%,M:0.3%,n:364 | flye    | 30 | 30 | GCA_947250695 |
| <i>Melanostoma mellinum</i>      | Diptera     | B                                                               | circular | 43   | 1 | 1875946 | C:99.2%[S:98.4%,D:0.8%],F:0.0%,M:0.8%,n:364 | flye    | 3  | 3  | GCA_947251465 |
| <i>Platycheirus albimanus</i>    | Diptera     | A                                                               | linear   | 12   | 6 | 1174338 | C:98.9%[S:98.9%,D:0.0%],F:0.5%,M:0.6%,n:364 | flye    | 0  | 1  | GCA_947179415 |
| <i>Sphaerophoria taeniata</i>    | Diptera     | A                                                               | circular | 37   | 1 | 1354583 | C:99.1%[S:98.6%,D:0.5%],F:0.5%,M:0.4%,n:364 | flye    | 2  | 23 | GCA_947250735 |
|                                  |             | B                                                               | linear   | 375  | 3 | 1627501 | C:99.4%[S:98.6%,D:0.8%],F:0.3%,M:0.3%,n:364 | flye    | 21 |    | GCA_947179355 |
| <i>Volucella inflata</i>         | Diptera     | A                                                               | circular | 44   | 1 | 1502845 | C:98.6%[S:97.0%,D:1.6%],F:0.5%,M:0.9%,n:364 | hifiasm | 3  | 6  | GCA_947250665 |
|                                  |             | A                                                               | linear   | 42   | 2 | 1346192 | C:99.5%[S:99.2%,D:0.3%],F:0.0%,M:0.5%,n:364 | hifiasm | 3  |    | GCA_947179175 |
| <i>Gymnosoma rotundatum</i>      | Diptera     | A                                                               | circular | 367  | 1 | 1431527 | C:98.9%[S:98.4%,D:0.5%],F:0.3%,M:0.8%,n:364 | flye    | 24 | 24 | GCA_947250765 |
| <i>Anomoia purmunda</i>          | Diptera     | A                                                               | circular | 177  | 1 | 1485792 | C:99.7%[S:99.2%,D:0.5%],F:0.0%,M:0.3%,n:364 | flye    | 10 | 10 | GCA_947251545 |
| <i>Merzomyia westermanni</i>     | Diptera     | A                                                               | circular | 163  | 1 | 1295458 | C:99.5%[S:99.2%,D:0.3%],F:0.0%,M:0.5%,n:364 | hifiasm | 10 | 10 | GCA_947251675 |
| <i>Bibio marci</i>               | Diptera     | A                                                               | circular | 91   | 1 | 1355352 | C:98.7%[S:98.4%,D:0.3%],F:0.3%,M:1.0%,n:364 | flye    | 3  | 3  | GCA_947251645 |
| <i>Himacerus mirmicoides</i>     | Hemiptera   | Not well assembled - unclear number of Wolbachia strains        |          |      |   |         |                                             |         |    |    |               |
| <i>Icerya purchasi</i>           | Hemiptera   | A                                                               | circular | 88   | 1 | 1372034 | C:99.4%[S:98.9%,D:0.5%],F:0.0%,M:0.6%,n:364 | hifiasm | 6  | 6  | GCA_947251635 |
| <i>Andrena dorsata</i>           | Hymenoptera | A                                                               | circular | 31   | 1 | 1366845 | C:99.2%[S:99.2%,D:0.0%],F:0.3%,M:0.5%,n:364 | hifiasm | 2  | 3  | GCA_947251765 |
|                                  |             | A                                                               | circular | 11   | 1 | 1533669 | C:99.7%[S:99.2%,D:0.5%],F:0.0%,M:0.3%,n:364 | hifiasm | 1  |    | GCA_947251685 |
| <i>Andrena haemorrhhoa</i>       | Hymenoptera | A                                                               | circular | 194  | 1 | 1494006 | C:98.9%[S:98.6%,D:0.3%],F:0.5%,M:0.6%,n:364 | hifiasm | 5  | 5  | GCA_947250565 |
| <i>Andrena hattorfiana</i>       | Hymenoptera | A                                                               | linear   | 7    | 3 | 1409226 | C:95.6%[S:95.3%,D:0.3%],F:2.7%,M:1.7%,n:364 | flye    | 0  | 1  | GCA_947179565 |
| <i>Nomada fabriciana</i>         | Hymenoptera | A                                                               | circular | 321  | 1 | 1438975 | C:99.5%[S:99.2%,D:0.3%],F:0.0%,M:0.5%,n:364 | flye    | 7  | 7  | GCA_947250795 |
| <i>Hylaeus communis</i>          | Hymenoptera | A                                                               | circular | 1030 | 1 | 1526906 | C:99.1%[S:98.6%,D:0.5%],F:0.3%,M:0.6%,n:364 | flye    | 31 | 31 | GCA_947251915 |
| <i>Ectemnius continuus</i>       | Hymenoptera | A                                                               | circular | 349  | 1 | 1299221 | C:99.5%[S:99.2%,D:0.3%],F:0.0%,M:0.5%,n:364 | flye    | 8  | 8  | GCA_947251695 |
| <i>Trypoxylon clavicerum</i>     | Hymenoptera | A                                                               | circular | 55   | 1 | 1287268 | C:98.6%[S:98.1%,D:0.5%],F:0.3%,M:1.1%,n:364 | flye    | 1  | 1  | GCA_947251665 |
| <i>Myrmica sabuleti</i>          | Hymenoptera | A                                                               | linear   | 49   | 1 | 1403111 | C:99.2%[S:99.2%,D:0.0%],F:0.3%,M:0.5%,n:364 | hifiasm | 2  | 2  | /             |
| <i>Lasioglossum calceatum</i>    | Hymenoptera | A                                                               | circular | 10   | 1 | 1271041 | C:98.7%[S:98.4%,D:0.3%],F:0.5%,M:0.8%,n:364 | flye    | 1  | 1  | /             |
| <i>Lasioglossum lativentre</i>   | Hymenoptera | A                                                               | linear   | 69   | 1 | 1306351 | C:99.5%[S:99.2%,D:0.3%],F:0.0%,M:0.5%,n:364 | flye    | 4  | 4  | GCA_947251945 |
| <i>Lasioglossum leucozonium</i>  | Hymenoptera | Not well assembled - high number of detected SNPs with 10x data |          |      |   |         |                                             |         |    |    |               |
| <i>Lasioglossum malachurum</i>   | Hymenoptera | A                                                               | linear   | 359  | 2 | 1380835 | C:98.9%[S:98.6%,D:0.3%],F:0.3%,M:0.8%,n:364 | flye    | 21 | 28 | GCA_947179495 |
|                                  |             | A                                                               | linear   | 119  | 2 | 1363507 | C:99.5%[S:99.5%,D:0.0%],F:0.0%,M:0.5%,n:364 | flye    | 7  |    | GCA_947179405 |
| <i>Lasioglossum morio</i>        | Hymenoptera | A                                                               | circular | 219  | 1 | 1282688 | C:99.5%[S:99.2%,D:0.3%],F:0.0%,M:0.5%,n:364 | hifiasm | 13 | 22 | GCA_947250585 |
|                                  |             | A                                                               | circular | 72   | 1 | 1270694 | C:99.2%[S:99.2%,D:0.0%],F:0.0%,M:0.8%,n:364 | hifiasm | 4  |    | GCA_947251705 |
|                                  |             | A                                                               | linear   | 79   | 1 | 1284395 | C:99.5%[S:99.2%,D:0.3%],F:0.0%,M:0.5%,n:364 | hifiasm | 5  |    | GCA_947250495 |
| <i>Seladonia tumulorum</i>       | Hymenoptera | Not well assembled - unclear number of Wolbachia strains        |          |      |   |         |                                             |         |    |    |               |
| <i>Sphecodes ephippius</i>       | Hymenoptera | A                                                               | linear   | 320  | 2 | 1317045 | C:99.1%[S:98.6%,D:0.5%],F:0.0%,M:0.9%,n:364 | hifiasm | 15 | 15 | GCA_947179545 |
|                                  |             | A                                                               | circular | 245  | 1 | 1359653 | C:98.9%[S:98.9%,D:0.0%],F:0.5%,M:0.6%,n:364 | flye    | 14 | 20 | GCA_947250685 |
| <i>Sphecodes monilicornis</i>    | Hymenoptera | A                                                               | circular | 107  | 1 | 1141923 | C:99.5%[S:99.5%,D:0.0%],F:0.0%,M:0.5%,n:364 | flye    | 6  | 6  | GCA_947251965 |
| <i>Scambus nigricans</i>         | Hymenoptera | A                                                               | circular | 148  | 1 | 1150903 | C:98.9%[S:98.9%,D:0.0%],F:0.3%,M:0.8%,n:364 | hifiasm | 9  | 9  | GCA_947251485 |
| <i>Macropis europaea</i>         | Hymenoptera | A                                                               | circular | 74   | 1 | 1439111 | C:99.7%[S:99.7%,D:0.0%],F:0.0%,M:0.3%,n:364 | hifiasm | 5  | 5  | GCA_947251555 |
| <i>Anoplius nigerimus</i>        | Hymenoptera | A                                                               | circular | 13   | 1 | 1345812 | C:98.3%[S:97.8%,D:0.5%],F:0.8%,M:0.9%,n:364 | flye    | 1  | 1  | GCA_947251795 |
| <i>Athalia cordata</i>           | Hymenoptera | B                                                               | circular | 2302 | 1 | 1345842 | C:99.5%[S:98.4%,D:1.1%],F:0.3%,M:0.2%,n:364 | flye    | 47 | 47 | GCA_947251845 |
| <i>Tiphia femorata</i>           | Hymenoptera | A                                                               | circular | 824  | 1 | 1330166 | C:98.1%[S:97.8%,D:0.3%],F:0.3%,M:1.6%,n:364 | hifiasm | 22 | 22 | GCA_947251725 |
| <i>Ancistrocerus nigricornis</i> | Hymenoptera | A                                                               | circular | 549  | 1 | 1265149 | C:99.5%[S:99.5%,D:0.0%],F:0.0%,M:0.5%,n:364 | flye    | 16 | 16 | GCA_947250785 |
| <i>Dolichovespula media</i>      | Hymenoptera | B                                                               | linear   | 479  | 3 | 1685384 | C:99.1%[S:98.6%,D:0.5%],F:0.3%,M:0.6%,n:364 | flye    | 13 | 13 | GCA_947179505 |
| <i>Ischnura elegans</i>          | Odonata     | B                                                               | circular | 33   | 1 | 2192296 | C:99.5%[S:98.4%,D:1.1%],F:0.0%,M:0.5%,n:364 | hifiasm | 3  | 3  | GCA_947251585 |

|                               |            |   |          |     |   |         |                                             |         |    |    |               |
|-------------------------------|------------|---|----------|-----|---|---------|---------------------------------------------|---------|----|----|---------------|
| <i>Sympetrum striolatum</i>   | Odonata    | A | linear   | 113 | 1 | 1516595 | C:99.1%[S:98.6%,D:0.5%],F:0.3%,M:0.6%,n:364 | hifiasm | 6  | 6  | GCA_947250715 |
| <i>Chorthippus brunneus</i>   | Orthoptera | B | linear   | 558 | 4 | 2013544 | C:99.5%[S:99.2%,D:0.3%],F:0.0%,M:0.5%,n:364 | flye    | 33 | 33 | GCA_947179555 |
| <i>Chorthippus parallelus</i> | Orthoptera | B | circular | 260 | 1 | 1748465 | C:99.5%[S:98.4%,D:1.1%],F:0.0%,M:0.5%,n:364 | flye    | 20 | 20 | GCA_947251815 |
