# Supplementary material for: Phylogenomic analysis of Wolbachia genomes from the Darwin Tree of Life biodiversity genomics project
Source: PubMed Central journal article supplement (PMC9894559; doi:10.1371/journal.pbio.3001972), 2023-01-23
Supplement: pbio.3001972.s005.pdf [file pbio.3001972.s005.pdf]

**S4 Table. Gene modules used to identify prophage regions**

| Module               | Gene family | Gene identifier                                                      |
|----------------------|-------------|----------------------------------------------------------------------|
| Connector /Baseplate | OG0000021   | gpI                                                                  |
| Connector /Baseplate | OG0000032   | gpJ                                                                  |
| Connector /Baseplate | OG0000034   | gpW                                                                  |
| Connector /Baseplate | OG0000058   | PAAR                                                                 |
| Connector /Baseplate | OG0000045   | gpV                                                                  |
| Connector /Baseplate | OG0000048   | Collar                                                               |
| Connector /Baseplate | OG0000044   | gpZ                                                                  |
| Connector /Baseplate | OG0000041   | gpFII                                                                |
| Head                 | OG0000036   | Major capsid protein GpE                                             |
| Head                 | OG0000042   | Head decoration protein D                                            |
| Head                 | OG0000035   | Minor capsid protein Orf7                                            |
| Head                 | OG0000025   | Phage portal protein, lambda family                                  |
| Head                 | OG0000049   | Head-to-tail joining protein W                                       |
| Head                 | OG0000030   | Phage terminase                                                      |
| Tail                 | OG0000068   | Tail sheath protein                                                  |
| Tail                 | OG0000064   | Major tail tube protein                                              |
| Tail                 | OG0000075   | gpG/GT                                                               |
| Tail                 | OG0000059   | Phage tail tape measure protein                                      |
| Tail                 | OG0000080   | gpX (Tail protein X)                                                 |
| Tail                 | OG0000066   | gpD (late control)                                                   |
| Fibre                | OG0000088   | Hypothetical protein                                                 |
| Fibre                | OG0000069   | Domain of unknown function DUF4815                                   |
| Fibre                | OG0000077   | Hypothetical protein                                                 |
| Fibre                | OG0000100   | Hypothetical protein                                                 |
| Fibre                | OG0000079   | Hypothetical protein                                                 |
| Fibre                | OG0000104   | Hypothetical protein                                                 |
| Phage                | OG0000000   | ankyrin repeat domain-containing protein, IS4 family transposase     |
| Phage                | OG0000002   | IS5 family transposase, IS5-like element ISWpi1 family transposase   |
| Phage                | OG0000006   | Rpn family recombination-promoting nuclease/putative transposase     |
| Phage                | OG0000007   | IS630 family transposase                                             |
| Phage                | OG0000008   | IS66-like element ISWen3 family transposase, IS66 family transposase |
| Phage                | OG0000009   | IS630 transposase-related protein, IS630 family transposase          |
| Phage                | OG0000017   | IS110-like element ISWen2 family transposase                         |
| Phage                | OG0000020   | recombinase family protein                                           |
| Phage                | OG0000023   | IS982 family transposase                                             |
| Phage                | OG0000024   | DUF6290 family protein                                               |

|       |           |                                                                                                                                                 |
|-------|-----------|-------------------------------------------------------------------------------------------------------------------------------------------------|
| Phage | OG0000029 | AAA family ATPase                                                                                                                               |
| Phage | OG0000038 | ankyrin repeat domain-containing protein                                                                                                        |
| Phage | OG0000039 | type II toxin-antitoxin system RelE/ParE family toxin,type II toxin-antitoxin system mRNA interferase toxin, RelE/StbE family                   |
| Phage | OG0000040 | HNH endonuclease,hypothetical protein,reverse transcriptase N-terminal domain-containing protein                                                |
| Phage | OG0000043 | AAA family ATPase                                                                                                                               |
| Phage | OG0000047 | ankyrin repeat domain-containing protein                                                                                                        |
| Phage | OG0000051 | patatin-like phospholipase family protein                                                                                                       |
| Phage | OG0000055 | hypothetical protein                                                                                                                            |
| Phage | OG0000056 | ankyrin repeat domain-containing protein                                                                                                        |
| Phage | OG0000057 | Holliday junction resolvase,hypothetical protein,endonuclease                                                                                   |
| Phage | OG0000060 | DUF2924 domain-containing protein                                                                                                               |
| Phage | OG0000061 | Ulp1 family isopeptidase                                                                                                                        |
| Phage | OG0000062 | DNA modification methylase                                                                                                                      |
| Phage | OG0000063 | IS110-like element ISWpi13 family transposase,IS110 family transposase                                                                          |
| Phage | OG0000074 | hypothetical protein                                                                                                                            |
| Phage | OG0000078 | ATP-binding protein                                                                                                                             |
| Phage | OG0000084 | ankyrin repeat domain-containing protein                                                                                                        |
| Phage | OG0000090 | hypothetical protein                                                                                                                            |
| Phage | OG0000094 | sigma-70 family RNA polymerase sigma factor                                                                                                     |
| Phage | OG0000108 | hypothetical protein                                                                                                                            |
| Phage | OG0000109 | phospholipase D family protein                                                                                                                  |
| Phage | OG0000113 | DUF1016 family protein,DUF1016 N-terminal domain-containing protein,DUF1016 domain-containing protein,PDDEXK nuclease domain-containing protein |
| Phage | OG0000114 | NAD-dependent DNA ligase LigA                                                                                                                   |
| Phage | OG0000121 | hypothetical protein                                                                                                                            |
| Phage | OG0000214 | XRE family transcriptional regulator,helix-turn-helix domain-containing protein                                                                 |
| Phage | OG0000845 | IS110 family transposase                                                                                                                        |
| Phage | OG0000900 | glycoside hydrolase family 25 protein                                                                                                           |
| Phage | OG0000938 | AAA family ATPase                                                                                                                               |
| Phage | OG0000950 | XRE family transcriptional regulator                                                                                                            |
| Phage | OG0000951 | recombinase family protein                                                                                                                      |
| Phage | OG0001032 | ankyrin repeat domain-containing protein                                                                                                        |
| Phage | OG0001048 | hypothetical protein                                                                                                                            |
| Phage | OG0001070 | hypothetical protein                                                                                                                            |
| Phage | OG0001075 | ankyrin repeat domain-containing protein                                                                                                        |
| Phage | OG0001088 | hypothetical protein                                                                                                                            |
| Phage | OG0001097 | ankyrin repeat domain-containing protein                                                                                                        |
| Phage | OG0001102 | site-specific DNA-methyltransferase                                                                                                             |
| Phage | OG0001157 | ankyrin repeat domain-containing protein                                                                                                        |

|         |           |                                                                                                                                                 |
|---------|-----------|-------------------------------------------------------------------------------------------------------------------------------------------------|
| Phage   | OG0001253 | ankyrin repeat domain-containing protein                                                                                                        |
| Phage   | OG0001277 | hypothetical protein                                                                                                                            |
| Phage   | OG0001298 | DUF5372 family protein                                                                                                                          |
| Phage   | OG0001510 | hypothetical protein                                                                                                                            |
| Phage   | OG0001530 | hypothetical protein                                                                                                                            |
| Phage   | OG0001544 | hypothetical protein                                                                                                                            |
| Phage   | OG0001578 | XRE family transcriptional regulator                                                                                                            |
| Phage   | OG0001601 | hypothetical protein                                                                                                                            |
| Phage   | OG0001671 | hypothetical protein                                                                                                                            |
| Phage   | OG0001721 | ankyrin repeat domain-containing protein                                                                                                        |
| Phage   | OG0001855 | hypothetical protein                                                                                                                            |
| Phage   | OG0002322 | hypothetical protein                                                                                                                            |
| Phage   | OG0002323 | ankyrin repeat domain-containing protein                                                                                                        |
| Phage   | OG0002331 | ankyrin repeat domain-containing protein                                                                                                        |
| Phage   | OG0002332 | type IV toxin-antitoxin system AbiEi family antitoxin                                                                                           |
| Phage   | OG0002333 | nucleotidyl transferase AbiEii/AbiGii toxin family protein                                                                                      |
| Undecim | OG0000095 | bifunctional UDP-N-acetylglucosamine diphosphorylase/glucosamine-1-phosphate N-acetyltransferase GlmU,NTP transferase domain-containing protein |
| Undecim | OG0000141 | ABC transporter ATP-binding protein/permease,ABC transporter ATP-binding protein                                                                |
| Undecim | OG0000258 | DMT family transporter                                                                                                                          |
| Undecim | OG0000868 | aminotransferase class I/II-fold pyridoxal phosphate-dependent enzyme,threonine aldolase family protein                                         |
| Undecim | OG0000874 | UDP-glucose/GDP-mannose dehydrogenase family protein                                                                                            |
| Undecim | OG0000879 | MFS transporter                                                                                                                                 |
| Undecim | OG0000893 | phytanoyl-CoA dioxygenase family protein                                                                                                        |
| Undecim | OG0000894 | threonine aldolase family protein                                                                                                               |
| Undecim | OG0000897 | hypothetical protein,WG repeat-containing protein                                                                                               |
| Undecim | OG0000899 | glycosyltransferase                                                                                                                             |
| Undecim | OG0000902 | SDR family oxidoreductase,NAD(P)-dependent oxidoreductase,GDP-mannose 4,6-dehydratase                                                           |
| Undecim | OG0001775 | glycosyltransferase                                                                                                                             |
| EAM     | OG0000001 | IS5 family transposase,transposase                                                                                                              |
| EAM     | OG0000003 | IS256 family transposase,hypothetical protein                                                                                                   |
| EAM     | OG0000005 | helix-turn-helix domain-containing protein,helix-turn-helix transcriptional regulator                                                           |
| EAM     | OG0000010 | ankyrin repeat domain-containing protein,hypothetical protein                                                                                   |
| EAM     | OG0000012 | DNA repair protein RadC                                                                                                                         |
| EAM     | OG0000014 | hypothetical protein                                                                                                                            |
| EAM     | OG0000018 | group II intron reverse transcriptase/maturase                                                                                                  |
| EAM     | OG0000022 | hypothetical protein                                                                                                                            |
| EAM     | OG0000027 | IS4 family transposase                                                                                                                          |
| EAM     | OG0000037 | ankyrin repeat domain-containing protein,hypothetical protein                                                                                   |

|     |           |                                                                                                                                                           |
|-----|-----------|-----------------------------------------------------------------------------------------------------------------------------------------------------------|
| EAM | OG0000050 | helix-turn-helix domain-containing protein                                                                                                                |
| EAM | OG0000052 | group II intron reverse transcriptase/maturase,hypothetical protein                                                                                       |
| EAM | OG0000054 | PD-(D/E)XK nuclease family transposase,Rpn family recombination-promoting nuclease/putative transposase                                                   |
| EAM | OG0000072 | IS3 family transposase,hypothetical protein                                                                                                               |
| EAM | OG0000087 | cytoplasmic incompatibility factor CifA,hypothetical protein                                                                                              |
| EAM | OG0000092 | DNA mismatch repair endonuclease MutL                                                                                                                     |
| EAM | OG0000093 | hypothetical protein                                                                                                                                      |
| EAM | OG0000112 | hypothetical protein,Rpn family recombination-promoting nuclease/putative transposase                                                                     |
| EAM | OG0000118 | hypothetical protein                                                                                                                                      |
| EAM | OG0000134 | hypothetical protein                                                                                                                                      |
| EAM | OG0000137 | integrase core domain-containing protein,IS481-like element ISWpi4 family transposase,IS481 family transposase,DDE-type integrase/transposase/recombinase |
| EAM | OG0000140 | virulence RhuM family protein,hypothetical protein                                                                                                        |
| EAM | OG0000154 | pyrimidine dimer DNA glycosylase/endonuclease V,hypothetical protein                                                                                      |
| EAM | OG0000156 | hypothetical protein                                                                                                                                      |
| EAM | OG0000158 | hypothetical protein                                                                                                                                      |
| EAM | OG0000165 | hypothetical protein                                                                                                                                      |
| EAM | OG0000221 | IS4 family transposase                                                                                                                                    |
| EAM | OG0000846 | ankyrin repeat domain-containing protein                                                                                                                  |
| EAM | OG0000910 | ankyrin repeat domain-containing protein                                                                                                                  |
| EAM | OG0000919 | hypothetical protein                                                                                                                                      |
| EAM | OG0000945 | Hsp20/alpha crystallin family protein                                                                                                                     |
| EAM | OG0000969 | DEAD/DEAH box helicase                                                                                                                                    |
| EAM | OG0000983 | Fic family protein                                                                                                                                        |
| EAM | OG0001000 | hypothetical protein,ankyrin repeat domain-containing protein                                                                                             |
| EAM | OG0001005 | hypothetical protein                                                                                                                                      |
| EAM | OG0001006 | hypothetical protein                                                                                                                                      |
| EAM | OG0001017 | ankyrin repeat domain-containing protein,hypothetical protein                                                                                             |
| EAM | OG0001024 | ankyrin repeat domain-containing protein                                                                                                                  |
| EAM | OG0001039 | hypothetical protein                                                                                                                                      |
| EAM | OG0001047 | hypothetical protein                                                                                                                                      |
| EAM | OG0001062 | ankyrin repeat domain-containing protein                                                                                                                  |
| EAM | OG0001104 | ankyrin repeat domain-containing protein                                                                                                                  |
| EAM | OG0001106 | hypothetical protein                                                                                                                                      |
| EAM | OG0001128 | ankyrin repeat domain-containing protein                                                                                                                  |
| EAM | OG0001155 | ankyrin repeat domain-containing protein                                                                                                                  |
| EAM | OG0001179 | AAA family ATPase                                                                                                                                         |
| EAM | OG0001188 | ankyrin repeat domain-containing protein                                                                                                                  |
| EAM | OG0001213 | hypothetical protein                                                                                                                                      |

|     |           |                                          |
|-----|-----------|------------------------------------------|
| EAM | OG0001218 | ankyrin repeat domain-containing protein |
| EAM | OG0001274 | hypothetical protein                     |
| EAM | OG0001432 | ATP-binding protein                      |
| EAM | OG0001554 | hypothetical protein                     |
