# Supplementary material for: Phylogenomic analysis of Wolbachia genomes from the Darwin Tree of Life biodiversity genomics project
Source: PubMed Central journal article supplement (PMC9894559; doi:10.1371/journal.pbio.3001972), 2023-01-23
Supplement: pbio.3001972.s006.pdf [file pbio.3001972.s006.pdf]

**S5 Table. Summary toxin genes**

|                            | <b>A</b>      | <b>B</b>     | <b>C</b> | <b>D</b> | <b>E</b> | <b>F</b> | <b>J</b> | <b>S</b> |
|----------------------------|---------------|--------------|----------|----------|----------|----------|----------|----------|
| <b>CifA-CifB</b>           | 98/144(76)    | 115/159 (64) |          |          |          | 0/2 (2)  |          |          |
| <b>RelE/RelB</b>           | 131/381 (106) | 41/164 (61)  |          | 0/2 (2)  | 3/4 (2)  | 0/7 (2)  |          |          |
| <b>Latrotoxin</b>          | 36/65 (36)    | 93/187 (75)  |          |          | 1/1 (1)  | 0/2 (2)  |          |          |
| <b>TcA</b>                 | 26/34 (20)    | 16/35 (15)   |          |          |          |          |          |          |
| <b>TcB-C</b>               | 7/11 (7)      | 12/24 (13)   |          |          |          |          |          |          |
| <b>ParD</b>                | 1/23(23)      | 0/37 (37)    |          |          | 2/3 (3)  | 0/1 (1)  |          |          |
| <b>ParE</b>                | 0/8 (8)       | 0/34 (34)    |          |          | 1/2 (2)  |          |          |          |
| <b>FIC</b>                 | 3/99 (93)     |              |          |          | 1/4 (3)  | 0/3 (3)  |          | 0/2 (2)  |
| <b>AbiEii/AbiGii-AbiEi</b> |               |              |          |          | 1/2 (2)  |          |          |          |

Number of genes located in the prophage region compared to the total number of toxin genes. In brackets is the number of species containing the toxin.
