# Supplementary material for: Phylogenomic analysis of Wolbachia genomes from the Darwin Tree of Life biodiversity genomics project
Source: PubMed Central journal article supplement (PMC9894559; doi:10.1371/journal.pbio.3001972), 2023-01-23
Supplement: pbio.3001972.s007.pdf [file pbio.3001972.s007.pdf]

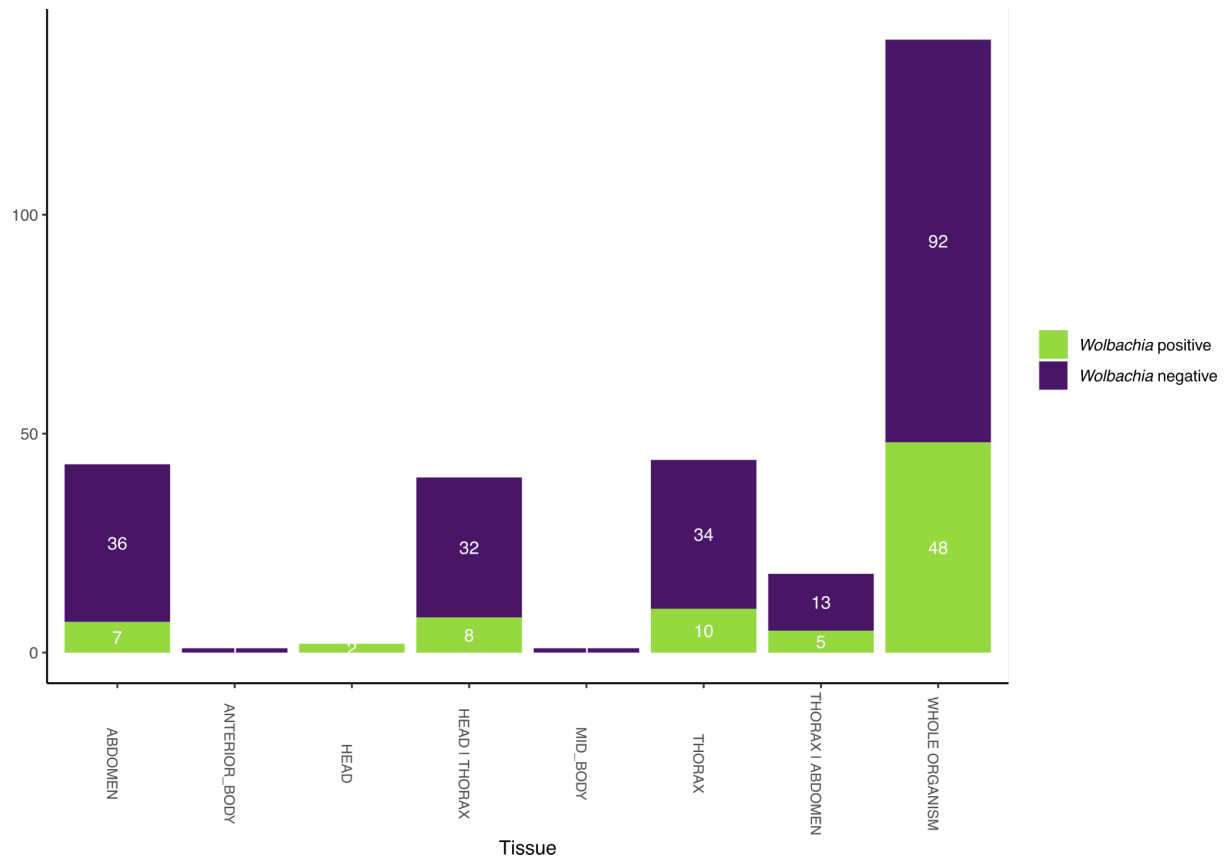

**S1 Fig.** Selected tissue and incidence of *Wolbachia* presence (green) and absence (purple) of DToL samples.
