# Supplementary material for: Phylogenomic analysis of Wolbachia genomes from the Darwin Tree of Life biodiversity genomics project
Source: PubMed Central journal article supplement (PMC9894559; doi:10.1371/journal.pbio.3001972), 2023-01-23
Supplement: pbio.3001972.s015.pdf [file pbio.3001972.s015.pdf]

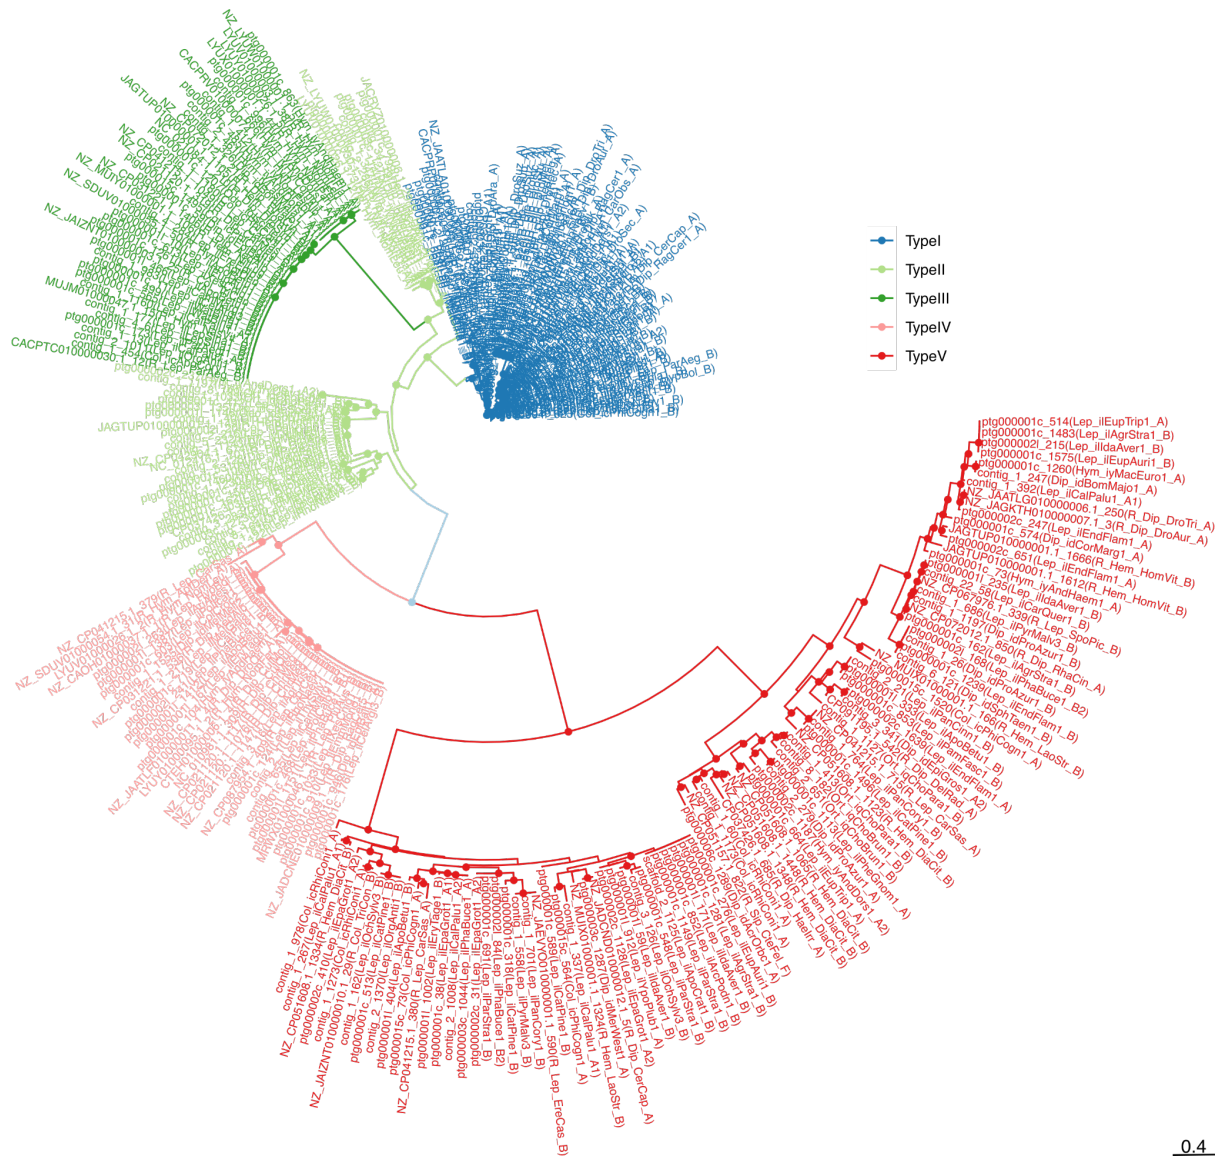

**S9 Fig.** Phylogeny of CifA toxin genes, highlighting nodes with a bootstrap value higher than 80 with a circle.
